# Supplementary material for: Mapping the native interaction surfaces of PREP1 with PBX1 by cross-linking mass-spectrometry and mutagenesis
Source: PubMed Central journal article supplement (PMC7545097; doi:10.1038/s41598-020-74032-w), 2020-10-08

## Supplementary Material

### Mapping the native interaction surfaces of PREP1 with PBX1 by cross-linking mass-spectrometry and mutagenesis.

Chiara Bruckmann <sup>1\*</sup>, Simone Tamburri <sup>1,3</sup>, Valentina De Lorenzi <sup>1,4</sup>, Nunzianna Doti <sup>2</sup>, Alessandra Monti <sup>2</sup>, Lisa Mathiasen <sup>1</sup>, Angela Cattaneo <sup>1,5</sup>, Menotti Ruvo <sup>2</sup>, Angela Bachi <sup>1</sup>, and Francesco Blasi <sup>1\*</sup>

1 IFOM (Foundation FIRC Institute of Molecular Oncology), via Adamello 16, 20139, Milan, Italy

2 Institute of Biostructures and Bioimaging (IBB)-CNR; via Mezzocannone 16, 80134, Naples, Italy

3 Present Address: Department of Experimental Oncology, European Institute of Oncology, via Adamello 16, 20139 Milano, Italy

4 Present Address: Center for Nanotechnology Innovation@NEST, Istituto Italiano di Tecnologia, Piazza San Silvestro 12, 56124, Pisa, Italy

5 Present Address: Cogentech S.R.L. Benefit Corporation IT Via Adamello 16, 20139 Milan, Italy

\* co-corresponding authors: chiara.bruckmann@ifom.eu, francesco.blasi@ifom.eu

## Supplementary Figures

### Figure S1

**Panel A:** Cross-linking mass-spectrometry workflow.

**Panel B:** SDS-PAGE of purified samples (PREP1-PBX1 and MEIS1-PBX1 complexes) and their BS<sup>3</sup> cross-link. In lane 1, the PREP1-PBX1 purified complex. In lanes 2-4 the PREP1-PBX1 cross-linked samples, used for mass-spectrometry analysis. In lane 5, the MEIS1-PBX1 purified complex. In lanes 6-8 the MEIS1-PBX1 cross-linked samples, used for mass-spectrometry analysis. The experiment was repeated twice, and the SDS PAGE shown is representative of one of the two experiments.

**Panel C:** cartoon model summarizing the overall folding of the PBX1-PREP1 complex, as comprehended from the XLMS data. The most relevant inter molecular interactions between domains are highlighted with a star, and the corresponding peptides identified are listed. In grey the PBX1 model, in purple the PREP1 model.

**Panel D:** cartoon model summarizing the overall folding of the PBX1-MEIS1 complex, as understood from the XLMS data. The most relevant inter molecular interactions between domains are highlighted with a star, and the corresponding peptides identified are listed. In grey the PBX1 model, in azure the MEIS1 model.

### Figure S2

**Panel A and B:** HR1 domains are highlighted in the red box, HR2 domains in the green box and the homeodomain (HD) is highlighted in the magenta box. The HR3 domain of PREP1 is highlighted in the dark green box. Stars above and below the sequence indicate the reactive lysines (K) in the cross-linking experiments. Heptad repeats of PREP1 and MEIS1 are highlighted in red.

**Panel C:** The PBX1,2,3 alignment. The PBC-A domain is highlighted in the grey box, the PBC-B in the orange box and the homeodomain (HD) in the magenta box. The dark-green boxes show the heptad repeats in the PBC-A analysed by mutations, while the red box shows the heptad repeat in the PBC-B domain. Stars above the sequence indicate the reactive lysines (K) in the cross-linking experiments.

### Figure S3

Circular Dichroism (CD) spectroscopic analysis of PREP1 and PBX1 proteins used in this study. All PREP1 mutants analyzed are those tested in the binding assays reported in **Figures 2C** and **2D**. All PBX1 deletion mutants analyzed are those tested in the binding assays reported in Figure 3B and **3C**. All PBX1 point mutants analyzed are those tested in the binding assay in **Figure 3D**.

**Panel A:** Overlay of CD spectra of wild-type PREP1 and point-mutants in the HR1 region.

**Panel B:** Overlay of CD spectra of wild-type PREP1 and point-mutants in the HR2 region

**Panel C:** Overlay of CD spectra of wild-type PREP1 and point-mutants in the HR3 region

**Panel D:** Overlay of CD spectra of wild-type PREP1 and the quadruple mutants HR1m and HR2m.

**Panel E:** An overlay of CD spectra of the wild-type protein and of the  $\Delta 43-53$ ,  $\Delta 77-84$ ,  $\Delta 105-113$  and  $\Delta 197-204$  analogs is shown.

**Panel F:** Overlay of CD spectra of wild-type PBX1 and point-mutants in I43, I46, L47, I50 and I53 within the PBC-A region

**Panel G:** Overlay of CD spectra of wild-type PBX1 and point-mutants in L77, V80, L81 and I84 within the PBC-A region

**Panel H:** Overlay of CD spectra of wild-type PBX1 and point-mutants in L105, L108 and L112 within the PBC-A region.

**Panel I:** Overlay of CD spectra of wild-type PBX1 and point-mutants in I197, I204 and I211 within the PBC-B region.

#### **Figure S4**

Expression levels of PREP1-GFP constructs in total lysates after retroviral infection of A549 cells. Immunoblot with anti-GFP (**Panel A**), anti-PBX1 (**Panel B**) and anti-vinculin (**Panel C**). In Panel B, above the PBX1 signal, it is also visible at 160 KDa the signal of vinculin, as anti-PBX1 was probed after vinculin.

In **Panel D** are shown the whole membranes of the immunoblots shown in **Figure 4B**.

#### **Figure S5**

Flow-cytometry analysis of A549 cells expressing wild-type and mutant PREP1-GFP fusion proteins used for the pull-down and for the immunofluorescence experiments. A549 were retrovirally transduced with wild-type PREP1-GFP (**Panel A**); PREP1-GFP HR1m (L63A/L66A/L67A/L70A) (**Panel B**); PREP1-GFP HR2m (I122A/L125A/L129A/L132A), (**Panel C**); and PREP1-GFP  $\Delta$ HR1+2 (**Panel D**) for stable expression. In addition, A549 were transduced with GFP (**Panel E**). In **Panel F** are shown control, not infected, cells. The figure shows the percentage of expression for PREP1-GFP wild-type and mutants in A549 cells.

#### **Figure S6**

SDS-PAGE of GST-affinity purified heterologous proteins expressed in *E. Coli* and of the constructs used for time-resolved fluorescence immunoassay (TR-FIA) and ELISA. Details of the samples purified are indicated next to each SDS-PAGE.

## Supplementary Tables

**Supplementary Table S1:** List of primers used for PREP1 mutagenesis

| Mutation    | Forward 5'->3'                                              | Reverse 5'->3'                                             |
|-------------|-------------------------------------------------------------|------------------------------------------------------------|
| PREP1 L63A  | CAACAAAGCTAATAATGGAAATGCTGGATGCCTATAA<br>ATGGCCTGC          | GCAGGCCATTATAGGCATCCAGCATTCCATTATTAG<br>CTTTGTTG           |
| PREP1 L66A  | CACATTTTCAACAACAAAGCTAATGCTGGAAATAG<br>TGGATGCCTATAAATGG    | CCATTTATAGGCATCCACTATTTCCAGCATTAGCTTTG<br>TTGTTTGAAAAATGTG |
| PREP1 L67A  | TTTCAAACAACAAAGCTGCTAATGGAAATAGTGGATG<br>CCTATAAATGGCCTG    | CAGGCCATTATAGGCATCCACTATTTCCATTAGCAGC<br>TTTGTGTTTGAAA     |
| PREP1 L69A  | TAGATTGTTACATTTTCAACAACGCAGCTAATAA<br>TGGAAATAGTGGATGCC     | GGCATCCACTATTTCCATTATTAGCTGCGTTGTTGAA<br>AAATGTGAACAATCTA  |
| PREP1 L70A  | CATCCACTATTTCCATTATTAGCTTTGCGTTTGAAAA<br>ATGTGAACAATCTACACA | TGTGTAGATTGTTACATTTTCAAACGCCAAAGCTA<br>ATAATGGAAATAGTGGATG |
| PREP1 L117A | TGGATTGCTTTTACCATTGCATTATCAGTTTCTGGATC<br>TTCACAAAAGAAAGG   | CCTTTCTTTTGTGAAGATCCAGAACTGATAATGCAA<br>TGGTAAAAGCAATCCA   |
| PREP1 I122A | GAATGCGCAAAACCTGGGCTGCTTTTACCATTAAATT<br>ATCAGTTTCTGGAT     | ATCCAGAACTGATAATTTAATGGTAAAAGCAGCCCA<br>GGTTTTGCGCATTCT    |
| PREP1 L124A | AATGGTAAAAGCAATCCAGGCTTTGCGCATTTCATCTTC<br>TTG              | CAAGAAGATGAATGCGCAAAGCCTGGATTGCTTTTAC<br>CATT              |
| PREP1 L125A | CAAGAAGATGAATGCGCGCAACCTGGATTGCTTTTACC<br>ATTAATTTATCAGT    | ACTGATAATTTAATGGTAAAAGCAATCCAGGTTGCGC<br>GCATTTCATCTTTG    |
| PREP1 L129A | ACCTTTTCCAGCTCAAGAGCATGAATGCGCAAAACCTG<br>GAT               | ATCCAGGTTTTCGCGCATTTCATGCTTTGAGCTGAAAA<br>GGT              |
| PREP1 L130A | CCTTTTCCAGCTCAGCAAGATGAATGCGCAAAACCTGG<br>AT                | ATCCAGGTTTTCGCGCATTTCATGCTTTGAGCTGAAAA<br>GG               |
| PREP1 L132A | GAGTTCGTTAACCTTTTCCGCCTCAAGAAGATGAATGC<br>GC                | GCGCATTTCATCTTCTTGGAGCGGAAAAGTTAACGAA<br>CTC               |
| PREP1 L245A | GATGCTGAGATCTTGGTTTGCCTGTAAGTGAAGCTGG<br>GAG                | CTCCAGCTTTCAGTTACAGGCAAACCAAGATCTCAGCA<br>TC               |
| PREP1 L249A | TGATGCAAGATGCTGGCATCTTGGTTTAACTGTAAGT<br>GAAGCTGG           | CCAGCTTTCAGTTACAGTTAAACCAAGATGCCAGCATCT<br>TGCATCA         |
| PREP1 L251A | GAACCATCATCTTGATGCAAGCGCTGAGATCTTGGTT<br>TAACTG             | CAGTTAAACCAAGATCTCAGCGCTTGCATCAAGATGA<br>TGGTTC            |
| PREP1 L252A | AGATGAACCATCATCTTGATGCGGATGCTGAGATCTT<br>GGTTTAACT          | GTAAACCAAGATCTCAGCATCGCGCATCAAGATGAT<br>GGTTCATCT          |

**Supplementary Table S2: List of primers used for PBX1 mutagenesis**

| <b>Mutation</b> | <b>Forward 5'-&gt;3'</b>                                 | <b>Reverse 5'-&gt;3'</b>                                |
|-----------------|----------------------------------------------------------|---------------------------------------------------------|
| PBX1 I43A       | GCTGTAAAATGTCTCCAGCGTCTGCTTCCTCC<br>CGC                  | GCGGGAGGAAGCAGGACGCTGGAGACATTTTAC<br>AGC                |
| PBX1 I46A       | GATGGTCATAATTTGCTGTAAAGCGTCTCCAAT<br>GTCCTGCTTCCTC       | GAGGAAGCAGGACATTGGAGACGCTTTACAGCA<br>AATTATGACCATC      |
| PBX1 L47A       | GTCATAATTTGCTGTGCAATGTCTCCAATGTCC<br>TGCTTCCTCC          | GGAGGAAGCAGGACATTGGAGACATTGCACAG<br>CAAATTATGAC         |
| PBX1 I50A       | ACTCTGGTCTGTGATGGTCATAGCTTGCTGTAA<br>AATGTCTCCAATG       | CATTGGAGACATTTTACAGCAAGCTATGACCAT<br>CACAGACCAGAGT      |
| PBX1 I53A       | CTCATCCAAACTCTGGTCTGTGGCGGTCAATA<br>TTGCTGTAAAATG        | CATTTTACAGCAAATTATGACCGCCACAGACCA<br>GAGTTTGGATGAG      |
| PBX1 L77A       | TTTCACACAACACATTAACCGGGCAGGCTTCA<br>TTCTGTGGC            | GCCACAGAATGAAGCCTGCCGCTTAATGTGT<br>TGTGTGAAA            |
| PBX1 V80A       | TTTTTCTTTGATTTACACAACGCATTAACA<br>AGGCAGGCTTCATT         | AATGAAGCCTGCCTTGTTAATGCGTTGTGTGA<br>AATCAAAGAAAAA       |
| PBX1 L81A       | AACTGTTTTTCTTTGATTTACACGCCACATT<br>AAACAAGGCAGGCTTCAT    | ATGAAGCCTGCCTTGTTAATGTGGCGTGTGAA<br>ATCAAAGAAAAACAGTT   |
| PBX1 I84A       | GGATACTCAAACCTGTTTTTCTTTGGCTTCAC<br>ACAACACATTAACAAGGCAG | CTGCCTTGTTAATGTGTGTGTGAAGCCAAAG<br>AAAAACAGTTTGTAGTATCC |
| PBX1 L105A      | GTCCAGCCGATCGCTGGGGGTCTGTG                               | CACAGACCCCCAGGCGATGCGGCTGGAC                            |
| PBX1 L108A      | AACAGCATGTTGTCCGCCGCATCAGCTGGGG                          | CCCAGCTGATGCGGGCGGACAACATGCTGTT                         |
| PBX1 L112A      | ACGCCTCCGCTAACGCCATGTTGTCCAGCCG                          | CGGCTGGACAACATGGCGTTAGCGGAAGGCGT                        |
| PBX1 I197A      | GCTGACCATCCGCTCAGCCTCCTTTGGGGAGAT<br>G                   | CATCTCCCAAAGGAGGCTGAGCGGATGGTCAG<br>C                   |
| PBX1 I204A      | GCTGAACTTGCGGTGGGCGATGCTGACCATCCG<br>C                   | GCGGATGGTCAGCATCGCCACCGCAAGTTCAG<br>C                   |
| PBX1 I211A      | CTTGAGCTGCATCTGGGCGGAGCTGAACTTGCG<br>G                   | CCGCAAGTTCAGCTCCGCCAGATGCAGCTCAA<br>G                   |
| PBX1Δ 43-55     | CGGGAGGAAGCAGGACCAGAGTTTGGATGAGG                         | CCTCATCCAAACTCTGGTCTGCTTCCTCCCG                         |
| PBX1Δ77-84      | GCCACAGAATGAAGCCTGCCAAAGAAAAACA<br>GTTTTGAGT             | ACTCAAACCTGTTTTTCTTTGGCAGGCTTCAT<br>TCTGTGGC            |
| PBX1 Δ105-113   | CCACGCCTCCGCTGGGGGTCTGTG                                 | CACAGACCCCCAGGCGGAAGGCGTGG                              |

|                |                                  |                                 |
|----------------|----------------------------------|---------------------------------|
| PBX1 Δ 197-204 | AGCTGAACTTGCGGTGCTCCTTTGGGGAGATG | CATCTCCCAAAGGAGCACCGCAAGTTCAGCT |
|----------------|----------------------------------|---------------------------------|

**Supplementary Table S3:** List of primers used for cloning PREP1-GFP into retroviral vector pBABE

| <b>Primer name</b> | <b>Sequence 5'-3'</b>            |
|--------------------|----------------------------------|
| PREP1FX            | ATCTCGAGGCCACCATGATGGCTACACAGACA |
| PREP1RK            | CGGGTACCATCTGCAGGGAGTCACTGT      |
| PREP1SnF           | CGTACGTAGCCACCATGATGGCTACA       |
| GFPSaR             | GCGTCGACTTACTTGTACAGCTCGTCCA     |
| GFPSnF             | CGTACGTAATGGTGAGCAAGGGCGA        |

Supplementary Table S4: PREP1-PBX1 cross-linked peptides Experiment #1

| Protein                                                     | Title                              | Spectrum Number | Precursor Mass<br>(Da) | Peptide                      | Peptide Mass<br>(Da) | Modifications    | Evalue   | Score<br>pLINK | Precursor Mass Error<br>(ppm) |
|-------------------------------------------------------------|------------------------------------|-----------------|------------------------|------------------------------|----------------------|------------------|----------|----------------|-------------------------------|
| <b>Charge</b>                                               |                                    |                 |                        |                              |                      |                  |          |                |                               |
| 26                                                          |                                    |                 |                        |                              |                      |                  |          |                |                               |
| sp P40424 PBX1_HUMAN (87)-sp P40424 PBX1_HUMAN (195)        | CB_4a_GluC.9754.9754.5.0.dta       | 5               | 2279.343935            | KTVLSIR(1)-TRPISPKIEI(7)     | 2279.344428          | null             | 8.80E-10 | 1.29E-13       | -0.21629                      |
|                                                             | CB_4a_GluC_bis.10057.10057.5.0.dta | 5               | 2279.345545            | KTVLSIR(1)-TRPISPKIEI(7)     | 2279.344428          | null             | 3.11E-10 | 2.40E-10       | 0.490053                      |
|                                                             | CB_4a_GluC_bis.10103.10103.4.0.dta | 4               | 2279.345922            | KTVLSIR(1)-TRPISPKIEI(7)     | 2279.344428          | null             | 9.04E-12 | 5.64E-10       | 0.655452                      |
|                                                             | CB_4a_GluC_bis.10136.10136.5.0.dta | 5               | 2279.345446            | KTVLSIR(1)-TRPISPKIEI(7)     | 2279.344428          | null             | 2.72E-09 | 1.49E-09       | 0.44662                       |
|                                                             | CB_4a_GluC.9742.9742.4.0.dta       | 4               | 2279.345322            | KTVLSIR(1)-TRPISPKIEI(7)     | 2279.344428          | null             | 2.04E-12 | 9.28E-08       | 0.392218                      |
|                                                             | CB_4a_GluC_bis.10028.10028.4.0.dta | 4               | 2279.345963            | KTVLSIR(1)-TRPISPKIEI(7)     | 2279.344428          | null             | 9.66E-14 | 1.27E-07       | 0.673439                      |
|                                                             | CB_4a_GluC.9830.9830.4.0.dta       | 4               | 2279.345502            | KTVLSIR(1)-TRPISPKIEI(7)     | 2279.344428          | null             | 1.75E-09 | 1.99E-06       | 0.471188                      |
|                                                             | CB_4a_GluC_bis.10197.10197.4.0.dta | 4               | 2279.346156            | KTVLSIR(1)-TRPISPKIEI(7)     | 2279.344428          | null             | 1.82E-07 | 9.40E-06       | 0.758113                      |
|                                                             | CB_4a_GluC_bis.10059.10059.3.0.dta | 3               | 2279.346376            | KTVLSIR(1)-TRPISPKIEI(7)     | 2279.344428          | null             | 2.11E-10 | 3.52E-04       | 0.854632                      |
|                                                             | CB_4a_GluC_bis.9696.9696.3.0.dta   | 3               | 1881.122483            | KTVLSIR(1)-TRPISPKIEI(7)     | 1881.116681          | null             | 2.24E-25 | 2.56E-13       | 3.084338                      |
|                                                             | CB_4a_GluC.9403.9403.3.0.dta       | 3               | 1881.12337             | KTVLSIR(1)-TRPISPKIEI(7)     | 1881.116681          | null             | 6.36E-18 | 7.08E-12       | 3.555867                      |
|                                                             | CB_4a_GluC.9477.9477.4.0.dta       | 4               | 1881.123865            | KTVLSIR(1)-TRPISPKIEI(7)     | 1881.116681          | null             | 1.04E-07 | 3.62E-10       | 3.819008                      |
|                                                             | CB_4a_GluC_bis.9767.9767.4.0.dta   | 4               | 1881.122834            | KTVLSIR(1)-TRPISPKIEI(7)     | 1881.116681          | null             | 2.72E-09 | 5.97E-10       | 3.270929                      |
|                                                             | CB_4a_GluC.9402.9402.4.0.dta       | 4               | 1881.12378             | KTVLSIR(1)-TRPISPKIEI(7)     | 1881.116681          | null             | 1.09E-12 | 8.91E-10       | 3.773822                      |
|                                                             | CB_4a_GluC_bis.9693.9693.4.0.dta   | 4               | 1881.122814            | KTVLSIR(1)-TRPISPKIEI(7)     | 1881.116681          | null             | 2.81E-12 | 2.19E-09       | 3.260297                      |
|                                                             | CB_4a_GluC_bis.9768.9768.3.0.dta   | 3               | 1881.122554            | KTVLSIR(1)-TRPISPKIEI(7)     | 1881.116681          | null             | 8.73E-15 | 9.02E-09       | 3.122082                      |
|                                                             | CB_4a_GluC_bis.9761.9761.4.0.dta   | 4               | 1881.122719            | KTVLSIR(1)-TRPISPKIEI(7)     | 1881.116681          | null             | 6.47E-02 | 4.63E-02       | 3.209796                      |
|                                                             | CB_4a_GluC_bis.9679.9679.4.1.dta   | 4               | 1881.123027            | KTVLSIR(1)-TRPISPKIEI(7)     | 1881.116681          | null             | 8.25E-02 | 2.06E-01       | 3.373528                      |
|                                                             | CB_4a_GluC.10439.10439.3.0.dta     | 3               | 1623.972658            | KTVLSIR(1)-PISPKEI(5)        | 1623.967905          | null             | 2.58E-12 | 1.21E-12       | 2.926782                      |
|                                                             | CB_4a_GluC_bis.10770.10770.3.0.dta | 3               | 1623.972863            | KTVLSIR(1)-PISPKEI(5)        | 1623.967905          | null             | 4.00E-14 | 2.31E-10       | 3.053016                      |
|                                                             | CB_4a_GluC_bis.10893.10893.4.0.dta | 4               | 2022.201093            | KTVLSIR(1)-PISPKEI(5)        | 2022.195653          | null             | 2.49E-08 | 1.54E-09       | 2.690145                      |
|                                                             | CB_4a_GluC.10538.10538.4.0.dta     | 4               | 2022.201371            | KTVLSIR(1)-PISPKEI(5)        | 2022.195653          | null             | 9.33E-09 | 1.57E-08       | 2.82762                       |
|                                                             | CB_4a_GluC.10816.10816.3.0.dta     | 3               | 2123.244962            | KTVLSIR(1)-TRPISPKIEI(7)     | 2123.243326          | null             | 5.14E-10 | 1.27E-08       | 0.770519                      |
|                                                             | CB_4a_GluC_bis.11167.11167.3.0.dta | 3               | 2123.246189            | KTVLSIR(1)-TRPISPKIEI(7)     | 2123.243326          | null             | 1.80E-11 | 2.38E-06       | 1.348409                      |
|                                                             | CB_4a_GluC_bis.11151.11151.4.0.dta | 4               | 2123.243463            | KTVLSIR(1)-TRPISPKIEI(7)     | 2123.243326          | null             | 4.32E-07 | 5.24E-06       | 0.084524                      |
|                                                             | CB_4a_GluC_bis.11212.11212.4.4.dta | 4               | 2123.243416            | KTVLSIR(1)-TRPISPKIEI(7)     | 2123.243326          | null             | 9.03E-07 | 4.01E-02       | 0.042388                      |
| sp P40424 PBX1_HUMAN (87)-sp P55347-2 PKNX1_HUMAN (55)      | CB_4a_GluC_bis.11198.11198.4.1.dta | 4               | 2621.393213            | KTVLSIR(1)-SQTPMDVDKQAIYR(9) | 2621.396588          | Oxidation[M](S)  | 1.90E-21 | 7.04E-13       | -1.287482                     |
|                                                             | CB_4a_GluC.10847.10847.4.2.dta     | 4               | 2621.394558            | KTVLSIR(1)-SQTPMDVDKQAIYR(9) | 2621.396588          | Oxidation[M](S)  | 1.84E-20 | 1.73E-10       | -0.774396                     |
|                                                             | CB_4a_GluC_bis.9730.9730.4.0.dta   | 4               | 1732.051638            | KTVLSIR(1)-KQAIYR(1)         | 1732.047881          | null             | 9.61E-14 | 2.75E-11       | 2.169109                      |
| sp P40424 PBX1_HUMAN (153)-sp P40424 PBX1_HUMAN (242)       | CB_4a_GluC_bis.9353.9353.3.0.dta   | 3               | 1904.025457            | AKLSQIR(2)-RNFKQATE(4)       | 1904.023512          | null             | 2.03E-08 | 1.42E-07       | 1.021521                      |
|                                                             | CB_4a_GluC.9111.9111.3.0.dta       | 3               | 1904.026698            | AKLSQIR(2)-RNFKQATE(4)       | 1904.023512          | null             | 4.27E-08 | 7.03E-06       | 1.673299                      |
|                                                             | CB_4a_GluC_bis.8166.8166.3.0.dta   | 3               | 2060.131075            | AKLSQIR(2)-RNFKQATE(5)       | 2060.124614          | null             | 1.42E-11 | 7.17E-05       | 3.136218                      |
|                                                             | CB_4a_GluC.7938.7938.3.0.dta       | 3               | 2060.131447            | AKLSQIR(2)-RNFKQATE(5)       | 2060.124614          | null             | 2.97E-11 | 7.94E-05       | 3.31679                       |
|                                                             | CB_4a_GluC_bis.8161.8161.4.0.dta   | 4               | 2060.127337            | AKLSQIR(2)-RNFKQATE(5)       | 2060.124614          | null             | 3.60E-07 | 1.05E-04       | 1.321765                      |
| sp P40424 PBX1_HUMAN (195)-sp P40424 PBX1_HUMAN (308)       | CB_4a_GluC.9054.9054.3.0.dta       | 3               | 1815.003442            | TRPISPKIEI(7)-ANIYAAK(7)     | 1815.00099           | null             | 1.42E-13 | 3.24E-06       | 1.350963                      |
|                                                             | CB_4a_GluC_bis.9713.9713.3.0.dta   | 3               | 2213.235603            | TRPISPKIEI(7)-ANIYAAK(7)     | 2213.228738          | null             | 2.06E-13 | 4.87E-04       | 3.101803                      |
|                                                             | CB_4a_GluC.9418.9418.3.0.dta       | 3               | 2213.237988            | TRPISPKIEI(7)-ANIYAAK(7)     | 2213.228738          | null             | 2.99E-13 | 1.07E-02       | 4.179414                      |
| sp P40424 PBX1_HUMAN (153)-sp P55347-2 PKNX1_HUMAN (268)    | CB_4a_GluC.9116.9116.5.0.dta       | 5               | 2275.308994            | AKLSQIR(2)-GVLPKHATNVNMR(S)  | 2275.306604          | null             | 2.59E-14 | 8.99E-12       | 1.050408                      |
|                                                             | CB_4a_GluC.9098.9098.4.0.dta       | 4               | 2275.30977             | AKLSQIR(2)-GVLPKHATNVNMR(S)  | 2275.306604          | null             | 1.80E-09 | 5.47E-07       | 1.391461                      |
|                                                             | CB_4a_GluC_bis.9247.9247.4.0.dta   | 4               | 2275.311392            | AKLSQIR(2)-GVLPKHATNVNMR(S)  | 2275.306604          | null             | 2.21E-12 | 1.07E-06       | 2.104332                      |
|                                                             | CB_4a_GluC.8127.8127.4.0.dta       | 4               | 2291.304888            | AKLSQIR(2)-GVLPKHATNVNMR(S)  | 2291.301518          | Oxidation[M](11) | 4.63E-05 | 9.68E-06       | 1.47078                       |
|                                                             | CB_4a_GluC_bis.9248.9248.5.0.dta   | 5               | 2275.310613            | AKLSQIR(2)-GVLPKHATNVNMR(S)  | 2275.306604          | null             | 2.98E-07 | 1.77E-05       | 1.76196                       |
|                                                             | CB_4a_GluC_bis.8304.8304.4.0.dta   | 4               | 2291.300449            | AKLSQIR(2)-GVLPKHATNVNMR(S)  | 2291.301518          | Oxidation[M](11) | 1.22E-05 | 7.53E-05       | -0.466547                     |
| sp P40424 PBX1_HUMAN (153)-sp P40424 PBX1_HUMAN (308)       | CB_4a_GluC_bis.10187.10187.3.0.dta | 3               | 1702.989814            | AKLSQIR(2)-ANIYAAK(7)        | 1702.984949          | null             | 3.38E-18 | 5.98E-11       | 2.856749                      |
| sp P40424 PBX1_HUMAN (153)-sp P55347-2 PKNX1_HUMAN (153)    | CB_4a_GluC.7888.7888.2.0.dta       | 2               | 1661.894684            | AKLSQIR(2)-TKMNSSE(2)        | 1661.889002          | null             | 2.72E-05 | 6.71E-11       | 3.419001                      |
|                                                             | CB_4a_GluC.7867.7867.3.0.dta       | 3               | 1661.891897            | AKLSQIR(2)-TKMNSSE(2)        | 1661.889002          | null             | 5.46E-11 | 1.01E-09       | 1.741994                      |
|                                                             | CB_4a_GluC_bis.8111.8111.3.0.dta   | 3               | 1661.890569            | AKLSQIR(2)-TKMNSSE(2)        | 1661.889002          | null             | 7.08E-12 | 4.24E-08       | 0.942903                      |
|                                                             | CB_4a_GluC.6717.6717.3.0.dta       | 3               | 1677.887834            | AKLSQIR(2)-TKMNSSE(2)        | 1677.883916          | Oxidation[M](13) | 3.70E-08 | 9.69E-08       | 2.335084                      |
|                                                             | CB_4a_GluC_bis.6937.6937.3.0.dta   | 3               | 1677.888735            | AKLSQIR(2)-TKMNSSE(2)        | 1677.883916          | Oxidation[M](13) | 1.09E-08 | 1.80E-05       | 2.87207                       |
| sp P40424 PBX1_HUMAN (308)-sp P55347-2 PKNX1_HUMAN (268)    | CB_4a_GluC.9835.9835.4.1.dta       | 4               | 2210.21193             | ANIYAAK(7)-GVLPKHATNVNMR(S)  | 2210.211314          | null             | 7.09E-14 | 1.19E-10       | 0.278706                      |
|                                                             | CB_4a_GluC_bis.10205.10205.3.0.dta | 3               | 2210.215623            | ANIYAAK(7)-GVLPKHATNVNMR(S)  | 2210.211314          | null             | 1.68E-20 | 2.52E-10       | 1.949587                      |
|                                                             | CB_4a_GluC_bis.10196.10196.4.0.dta | 4               | 2210.217331            | ANIYAAK(7)-GVLPKHATNVNMR(S)  | 2210.211314          | null             | 2.66E-14 | 2.12E-08       | 2.722364                      |
|                                                             | CB_4a_GluC_bis.9187.9187.4.1.dta   | 4               | 2226.213222            | ANIYAAK(7)-GVLPKHATNVNMR(S)  | 2226.206228          | Oxidation[M](11) | 4.08E-13 | 3.72E-05       | 3.141668                      |
| sp P40424 PBX1_HUMAN (242)-sp P40424 PBX1_HUMAN (308)       | CB_4a_GluC_bis.9103.9103.3.0.dta   | 3               | 1995.031981            | RNFKQATE(5)-ANIYAAK(7)       | 1995.029323          | null             | 1.93E-15 | 1.95E-06       | 1.332311                      |
|                                                             | CB_4a_GluC.8843.8843.3.0.dta       | 3               | 1995.034195            | RNFKQATE(5)-ANIYAAK(7)       | 1995.029323          | null             | 2.17E-13 | 2.00E-06       | 2.442069                      |
| sp P55347-2 PKNX1_HUMAN (134)-sp P55347-2 PKNX1_HUMAN (268) | CB_4a_GluC_bis.9395.9395.4.0.dta   | 4               | 2191.192764            | LEK(VNE(3)-GVLPKHATNVNMR(S)  | 2191.190244          | null             | 1.81E-05 | 4.72E-04       | 1.15006                       |

**Table legend**

|                      |                                                                                                                                    |
|----------------------|------------------------------------------------------------------------------------------------------------------------------------|
| Protein              | Accession number of the proteins involved in cross linking; the site position of the xi-Lys on the protein is reported in brackets |
| Title                | File name .dat (and corresponding .tif) of the ms2 annotated spectrum (as reported in the repository)                              |
| Spectrum Number      | Frequency of the ms2 spectra                                                                                                       |
| Charge               | Charge of the fragmented ion                                                                                                       |
| Precursor Mass       | Observed mass from the precursor ion (Da)                                                                                          |
| Peptide              | Sequence of cross-linked peptide pair; the site position of the Lys involved in cross-linking is reported in brackets              |
| Peptide Mass         | Theoretical mass of cross-linked peptide (Da)                                                                                      |
| Modifications        | Cys Carbamidomethyl or Met Oxidation                                                                                               |
| Evalue               |                                                                                                                                    |
| Score                | pLink score                                                                                                                        |
| Precursor Mass Error | precursor mass error in ppm                                                                                                        |

Criteria applied for manual evaluation of spectra confidently identified = E-value < 0.001 (corresponding to FDR < 0.05); the majority of the ions of the spectrum are assigned and 4 consecutive b or y ions for each xi peptide pair observed

Supplementary Table S5: PREP1-PBX1 looped peptides Experiment #1

| Protein                           | Title                            | Spectrum Number | Precursor Mass<br>(Da) | Peptide                 | Peptide Mass<br>(Da) | Modifications         | Value    | Score<br>pLINK | Precursor Mass Error<br>(ppm) |
|-----------------------------------|----------------------------------|-----------------|------------------------|-------------------------|----------------------|-----------------------|----------|----------------|-------------------------------|
|                                   |                                  | Charge          |                        |                         |                      |                       |          |                |                               |
| sp P40424 PBX1_HUMAN(292)(293)    |                                  | 7               |                        |                         |                      |                       |          |                |                               |
|                                   | CB_4a_GluC.10473.10473.2.0.dta   | 2               | 1521,797828            | YKKNIGKFEQE(2)(3)       | 1521,794702          | null                  | 3,66E-50 | 2,10E-02       | 2,054154                      |
|                                   | CB_4a_GluC.7545.7545.3.0.dta     | 3               | 1257,7674              | IRYKKNIGK(4)(5)         | 1257,767706          | null                  | 3,55E-15 | 3,40E-02       | -0,243288                     |
|                                   | CB_4a_GluC.7564.7564.2.0.dta     | 2               | 1257,768681            | IRYKKNIGK(4)(5)         | 1257,767706          | null                  | 9,76E-28 | 3,98E-02       | 0,775183                      |
|                                   | CB_4a_GluC.7255.7255.2.0.dta     | 2               | 988,584147             | YKKNIGK(2)(3)           | 988,582546           | null                  | 9,15E-14 | 3,48E-02       | 1,61949                       |
|                                   | CB_4a_GluC.7178.7178.2.0.dta     | 2               | 988,584185             | YKKNIGK(2)(3)           | 988,582546           | null                  | 2,68E-19 | 4,00E-02       | 1,657929                      |
|                                   | CB_4a_GluC_bis.7423.7423.2.0.dta | 2               | 988,583137             | YKKNIGK(2)(3)           | 988,582546           | null                  | 4,14E-26 | 7,56E-02       | 0,597826                      |
|                                   | CB_4a_GluC.7173.7173.2.0.dta     | 2               | 988,584425             | YKKNIGK(2)(3)           | 988,582546           | null                  | 2,07E-18 | 8,70E-02       | 1,900701                      |
| sp P55347-2 PKNX1_HUMAN(334)(335) |                                  | 4               |                        |                         |                      |                       |          |                |                               |
|                                   | CB_4a_GluC.3713.3713.2.0.dta     | 2               | 1463,844217            | KKTAQNRPVQR(1)(2)       | 1463,844048          | null                  | 1,90E-16 | 5,05E-02       | 0,115449                      |
|                                   | CB_4a_GluC.3698.3698.3.0.dta     | 3               | 1463,844439            | KKTAQNRPVQR(1)(2)       | 1463,844048          | null                  | 2,49E-26 | 6,40E-02       | 0,267105                      |
|                                   | CB_4a_GluC.3372.3372.2.0.dta     | 2               | 983,565388             | KKTAQNR(1)(2)           | 983,563206           | null                  | 1,21E-30 | 5,90E-02       | 2,218464                      |
|                                   | CB_4a_GluC_bis.3462.3462.2.0.dta | 2               | 983,565925             | KKTAQNR(1)(2)           | 983,563206           | null                  | 2,59E-23 | 1,16E-01       | 2,764439                      |
| sp P55347-2 PKNX1_HUMAN(331)(333) |                                  | 2               |                        |                         |                      |                       |          |                |                               |
|                                   | CB_4a_GluC.4661.4661.2.0.dta     | 2               | 1390,689554            | SSCSETPKTKK(8)(10)      | 1390,688191          | Carbamidomethyl[C](3) | 2,04E-26 | 3,10E-02       | 0,98009                       |
|                                   | CB_4a_GluC_bis.4856.4856.2.0.dta | 2               | 1390,688445            | SSCSETPKTKK(8)(10)      | 1390,688191          | Carbamidomethyl[C](3) | 2,27E-44 | 7,11E-02       | 0,182643                      |
| sp P55347-2 PKNX1_HUMAN(260)(262) |                                  | 5               |                        |                         |                      |                       |          |                |                               |
|                                   | CB_4a_GluC.7682.7682.4.0.dta     | 4               | 1835,962896            | LSILHQDDGSSKNKR(12)(14) | 1835,960913          | null                  | 3,46E-28 | 4,87E-02       | 1,080088                      |
|                                   | CB_4a_GluC.8535.8535.3.0.dta     | 3               | 1835,968132            | LSILHQDDGSSKNKR(12)(14) | 1835,960913          | null                  | 4,19E-32 | 6,15E-02       | 3,932001                      |
|                                   | CB_4a_GluC_bis.8825.8825.3.0.dta | 3               | 1835,967448            | LSILHQDDGSSKNKR(12)(14) | 1835,960913          | null                  | 1,28E-65 | 6,90E-02       | 3,559444                      |
|                                   | CB_4a_GluC_bis.8904.8904.3.0.dta | 3               | 1835,967345            | LSILHQDDGSSKNKR(12)(14) | 1835,960913          | null                  | 3,93E-33 | 9,89E-02       | 3,503343                      |
|                                   | CB_4a_GluC_bis.9017.9017.3.0.dta | 3               | 1835,960322            | LSILHQDDGSSKNKR(12)(14) | 1835,960913          | null                  | 4,63E-24 | 1,25E-01       | -0,321902                     |

**Table legend**

|                      |                                                                                                                                    |
|----------------------|------------------------------------------------------------------------------------------------------------------------------------|
| Protein              | Accession number of the proteins involved in cross linking; the site position of the xl-Lys on the protein is reported in brackets |
| Title                | File name .dat (and corresponding .tif) of the ms2 annotated spectrum (as reported in the repository)                              |
| Spectrum Number      | Frequency of the ms2 spectra                                                                                                       |
| Charge               | Charge of the fragmented ion                                                                                                       |
| Precursor Mass       | Observed mass from the precursor ion (Da)                                                                                          |
| Peptide              | Sequence of cross-linked peptide pair, the site position of the Lys involved in cross-linking is reported in brackets              |
| Peptide Mass         | Theoretical mass of cross-linked peptide (Da)                                                                                      |
| Modifications        | Cys Carbamidomethyl or Met Oxidation                                                                                               |
| Value                |                                                                                                                                    |
| Score                | pLink score                                                                                                                        |
| Precursor Mass Error | precursor mass error in ppm                                                                                                        |

Criteria applied for manual evaluation of spectra confidently identified = E-value < 0,001 (corresponding to FDR < 0,05); the majority of the ions of the spectrum are assigned and 4 consecutive b or y ions for each xl peptide pair observed





|                                                           |                                                    |   |             |                                |             |                                                                    |          |          |          |
|-----------------------------------------------------------|----------------------------------------------------|---|-------------|--------------------------------|-------------|--------------------------------------------------------------------|----------|----------|----------|
|                                                           | CB_FB_180416_Prep1_Tryp_GluC_3.11952.11952.3.0.dta | 3 | 1769,115016 | KTLSLR(1)-AKLSQIR(2)           | 1769,10064  | null                                                               | 5,98E-09 | 2,06E-10 | 8,126163 |
| sp P40424 PXB1_HUMAN(308)-sp P55347-2 PKNX1_HUMAN(134)    |                                                    | 1 |             |                                |             |                                                                    |          |          |          |
|                                                           | CB_FB_180416_Prep1_Tryp_GluC_3.11861.11861.2.0.dta | 2 | 1618,87949  | ANIYAAK(7)-LEKVNE(3)           | 1618,868589 | null                                                               | 8,79E-10 | 1,43E-09 | 6,733715 |
| sp P40424 PXB1_HUMAN(65)-sp P40424 PXB1_HUMAN(308)        |                                                    | 1 |             |                                |             |                                                                    |          |          |          |
|                                                           | CB_FB_180416_Prep1_Tryp_GluC_3.7161.7161.4.0.dta   | 4 | 1923,013309 | KHALNCHR(1)-ANIYAAK(7)         | 1923,001671 | Carbamidomethyl[C](6)                                              | 2,84E-08 | 3,57E-09 | 6,051997 |
| sp P40424 PXB1_HUMAN(65)-sp P40424 PXB1_HUMAN(74)         |                                                    | 3 |             |                                |             |                                                                    |          |          |          |
|                                                           | CB_FB_180416_Prep1_Tryp_GluC_3.14528.14528.3.0.dta | 3 | 2510,260131 | KHALNCHR(1)-MKPALFNVLCE(2)     | 2510,246384 | Carbamidomethyl[C](10);Oxidation[M](1);Carbamidomethyl[C](2)       | 1,40E-13 | 1,05E-08 | 5,476355 |
|                                                           | CB_FB_180416_Prep1_Tryp_GluC_3.14544.14544.5.0.dta | 5 | 2510,255566 | KHALNCHR(1)-MKPALFNVLCE(2)     | 2510,246384 | Carbamidomethyl[C](10);Oxidation[M](1);Carbamidomethyl[C](2)       | 1,33E-07 | 3,01E-05 | 3,695255 |
|                                                           | CB_FB_180416_Prep1_Tryp_GluC_3.15057.15057.3.0.dta | 3 | 2494,267085 | KHALNCHR(1)-MKPALFNVLCE(2)     | 2494,25147  | Carbamidomethyl[C](10);Carbamidomethyl[C](2)                       | 1,24E-10 | 1,76E-04 | 6,260395 |
| sp P40424 PXB1_HUMAN(65)-sp P40424 PXB1_HUMAN(87)         |                                                    | 1 |             |                                |             |                                                                    |          |          |          |
|                                                           | CB_FB_180416_Prep1_Tryp_GluC_3.7771.7771.4.2.dta   | 4 | 1989,127062 | KHALNCHR(1)-KTLSLR(1)          | 1989,117362 | Carbamidomethyl[C](6)                                              | 1,89E-09 | 1,77E-06 | 4,876535 |
| sp P40424 PXB1_HUMAN(308)-sp P55347-2 PKNX1_HUMAN(268)    |                                                    | 4 |             |                                |             |                                                                    |          |          |          |
|                                                           | CB_FB_180416_Prep1_Tryp_GluC_3.11541.11541.3.0.dta | 3 | 2210,227111 | ANIYAAK(7)-GVLPHKATNVMR(5)     | 2210,211314 | null                                                               | 5,37E-18 | 1,82E-06 | 7,14728  |
|                                                           | CB_FB_180416_Prep1_Tryp_GluC_3.11549.11549.4.0.dta | 4 | 2210,226008 | ANIYAAK(7)-GVLPHKATNVMR(5)     | 2210,211314 | null                                                               | 3,25E-11 | 7,44E-04 | 6,648233 |
|                                                           | CB_FB_180416_Prep1_Tryp_GluC_3.10416.10416.4.0.dta | 4 | 2226,221772 | ANIYAAK(7)-GVLPHKATNVMR(5)     | 2226,206228 | Oxidation[M](11)                                                   | 2,67E-12 | 9,16E-04 | 6,982282 |
|                                                           | CB_FB_180416_Prep1_Tryp_GluC_3.11626.11626.3.0.dta | 3 | 2210,227032 | ANIYAAK(7)-GVLPHKATNVMR(5)     | 2210,211314 | null                                                               | 1,75E-12 | 3,67E-02 | 7,111537 |
| sp P40424 PXB1_HUMAN(87)-sp P55347-2 PKNX1_HUMAN(268)     |                                                    | 2 |             |                                |             |                                                                    |          |          |          |
|                                                           | CB_FB_180416_Prep1_Tryp_GluC_3.11800.11800.5.0.dta | 5 | 2276,339091 | KTLSLR(1)-GVLPHKATNVMR(5)      | 2276,327005 | null                                                               | 9,81E-10 | 2,21E-06 | 5,30943  |
|                                                           | CB_FB_180416_Prep1_Tryp_GluC_3.10849.10849.5.0.dta | 5 | 2292,330628 | KTLSLR(1)-GVLPHKATNVMR(5)      | 2292,321919 | Oxidation[M](11)                                                   | 1,93E-04 | 4,63E-03 | 3,799205 |
| sp P40424 PXB1_HUMAN(87)-sp P55347-2 PKNX1_HUMAN(73)      |                                                    | 2 |             |                                |             |                                                                    |          |          |          |
|                                                           | CB_FB_180416_Prep1_Tryp_GluC_3.9431.9431.3.0.dta   | 3 | 2107,082479 | KTLSLR(1)-KCEQSTQGS(1)         | 2107,069859 | Carbamidomethyl[C](2)                                              | 8,13E-15 | 2,26E-06 | 5,98936  |
|                                                           | CB_FB_180416_Prep1_Tryp_GluC_3.9468.9468.2.0.dta   | 2 | 2107,078565 | KTLSLR(1)-KCEQSTQGS(1)         | 2107,069859 | Carbamidomethyl[C](2)                                              | 8,89E-11 | 1,37E-02 | 4,131804 |
| sp P40424 PXB1_HUMAN(308)-sp P55347-2 PKNX1_HUMAN(140)    |                                                    | 1 |             |                                |             |                                                                    |          |          |          |
|                                                           | CB_FB_180416_Prep1_Tryp_GluC_3.12398.12398.3.0.dta | 3 | 1972,974595 | ANIYAAK(7)-LCKDFCSR(3)         | 1972,96184  | Carbamidomethyl[C](2);Carbamidomethyl[C](6)                        | 4,02E-14 | 3,87E-06 | 6,464899 |
| sp P40424 PXB1_HUMAN(153)-sp P55347-2 PKNX1_HUMAN(268)    |                                                    | 5 |             |                                |             |                                                                    |          |          |          |
|                                                           | CB_FB_180416_Prep1_Tryp_GluC_3.10373.10373.5.0.dta | 5 | 2275,318296 | AKLSQIR(2)-GVLPHKATNVMR(5)     | 2275,306604 | null                                                               | 4,37E-08 | 5,39E-06 | 5,138648 |
|                                                           | CB_FB_180416_Prep1_Tryp_GluC_3.10482.10482.5.0.dta | 5 | 2275,320514 | AKLSQIR(2)-GVLPHKATNVMR(5)     | 2275,306604 | null                                                               | 1,05E-08 | 1,26E-05 | 6,113462 |
|                                                           | CB_FB_180416_Prep1_Tryp_GluC_3.9111.9111.4.0.dta   | 4 | 2291,312125 | AKLSQIR(2)-GVLPHKATNVMR(5)     | 2291,301518 | Oxidation[M](11)                                                   | 6,34E-06 | 4,94E-02 | 4,629247 |
|                                                           | CB_FB_180416_Prep1_Tryp_GluC_3.10378.10378.4.0.dta | 4 | 2275,318867 | AKLSQIR(2)-GVLPHKATNVMR(5)     | 2275,306604 | null                                                               | 1,54E-09 | 1,33E-01 | 5,389603 |
|                                                           | CB_FB_180416_Prep1_Tryp_GluC_3.9117.9117.3.0.dta   | 3 | 2291,308453 | AKLSQIR(2)-GVLPHKATNVMR(5)     | 2291,301518 | Oxidation[M](11)                                                   | 3,74E-11 | 1,97E-01 | 3,026664 |
| sp P55347-2 PKNX1_HUMAN(140)-sp P55347-2 PKNX1_HUMAN(151) |                                                    | 2 |             |                                |             |                                                                    |          |          |          |
|                                                           | CB_FB_180416_Prep1_Tryp_GluC_3.11965.11965.3.0.dta | 3 | 2219,118045 | LCKDFCSR(3)-YIACLKTK(6)        | 2219,102025 | Carbamidomethyl[C](2);Carbamidomethyl[C](6);Carbamidomethyl[C](15) | 4,45E-10 | 2,28E-04 | 7,219136 |
|                                                           | CB_FB_180416_Prep1_Tryp_GluC_3.11951.11951.4.0.dta | 4 | 2219,117154 | LCKDFCSR(3)-YIACLKTK(6)        | 2219,102025 | Carbamidomethyl[C](2);Carbamidomethyl[C](6);Carbamidomethyl[C](15) | 4,25E-07 | 1,79E-02 | 6,817623 |
| sp P40424 PXB1_HUMAN(65)-sp P55347-2 PKNX1_HUMAN(134)     |                                                    | 7 |             |                                |             |                                                                    |          |          |          |
|                                                           | CB_FB_180416_Prep1_Tryp_GluC_3.6041.6041.4.0.dta   | 4 | 1903,987187 | KHALNCHR(1)-LEKVNE(3)          | 1903,980601 | Carbamidomethyl[C](6)                                              | 8,86E-05 | 2,83E-04 | 3,459069 |
|                                                           | CB_FB_180416_Prep1_Tryp_GluC_3.5852.5852.4.0.dta   | 4 | 1903,988696 | KHALNCHR(1)-LEKVNE(3)          | 1903,980601 | Carbamidomethyl[C](6)                                              | 1,42E-05 | 4,64E-04 | 4,251619 |
|                                                           | CB_FB_180416_Prep1_Tryp_GluC_3.6247.6247.4.0.dta   | 4 | 1903,992024 | KHALNCHR(1)-LEKVNE(3)          | 1903,980601 | Carbamidomethyl[C](6)                                              | 2,53E-05 | 8,60E-04 | 5,99536  |
|                                                           | CB_FB_180416_Prep1_Tryp_GluC_3.6148.6148.4.0.dta   | 4 | 1903,989296 | KHALNCHR(1)-LEKVNE(3)          | 1903,980601 | Carbamidomethyl[C](6)                                              | 7,15E-05 | 2,07E-03 | 4,566748 |
|                                                           | CB_FB_180416_Prep1_Tryp_GluC_3.6454.6454.4.0.dta   | 4 | 1903,987391 | KHALNCHR(1)-LEKVNE(3)          | 1903,980601 | Carbamidomethyl[C](6)                                              | 8,19E-05 | 3,38E-03 | 3,566213 |
|                                                           | CB_FB_180416_Prep1_Tryp_GluC_3.5854.5854.3.0.dta   | 3 | 1903,987774 | KHALNCHR(1)-LEKVNE(3)          | 1903,980601 | Carbamidomethyl[C](6)                                              | 5,41E-06 | 4,19E-03 | 3,76737  |
|                                                           | CB_FB_180416_Prep1_Tryp_GluC_3.6859.6859.4.2.dta   | 4 | 1903,989531 | KHALNCHR(1)-LEKVNE(3)          | 1903,980601 | Carbamidomethyl[C](6)                                              | 1,98E-05 | 1,12E-02 | 4,690174 |
| sp P40424 PXB1_HUMAN(87)-sp P55347-2 PKNX1_HUMAN(25)      |                                                    | 1 |             |                                |             |                                                                    |          |          |          |
|                                                           | CB_FB_180416_Prep1_Tryp_GluC_3.11184.11184.3.0.dta | 3 | 1686,972671 | KTLSLR(1)-LKTEQD(2)            | 1686,963545 | null                                                               | 2,04E-05 | 7,15E-04 | 5,40972  |
| sp P40424 PXB1_HUMAN(74)-sp P40424 PXB1_HUMAN(195)        |                                                    | 1 |             |                                |             |                                                                    |          |          |          |
|                                                           | CB_FB_180416_Prep1_Tryp_GluC_3.17071.17071.3.0.dta | 3 | 2402,264905 | MKPALFNVLCE(2)-TRPISPKE(7)     | 2402,245703 | Carbamidomethyl[C](10);Oxidation[M](1)                             | 5,00E-13 | 3,83E-03 | 7,993354 |
| sp P40424 PXB1_HUMAN(195)-sp P55347-2 PKNX1_HUMAN(268)    |                                                    | 5 |             |                                |             |                                                                    |          |          |          |
|                                                           | CB_FB_180416_Prep1_Tryp_GluC_3.9166.9166.5.0.dta   | 5 | 2801,557108 | TRPISPKEIER(7)-GVLPHKATNVMR(5) | 2801,545307 | Oxidation[M](11)                                                   | 2,37E-08 | 1,81E-02 | 4,212318 |
| sp P40424 PXB1_HUMAN(153)-sp P55347-2 PKNX1_HUMAN(151)    |                                                    | 1 |             |                                |             |                                                                    |          |          |          |
|                                                           | CB_FB_180416_Prep1_Tryp_GluC_3.11216.11216.4.0.dta | 4 | 1949,137576 | AKLSQIR(2)-YIACLKTK(6)         | 1949,125135 | Carbamidomethyl[C](4)                                              | 6,73E-06 | 5,36E-02 | 6,382864 |
| sp P40424 PXB1_HUMAN(65)-sp P55347-2 PKNX1_HUMAN(25)      |                                                    | 1 |             |                                |             |                                                                    |          |          |          |
|                                                           | CB_FB_180416_Prep1_Tryp_GluC_3.6023.6023.3.0.dta   | 3 | 2905,338727 | KHALNCHR(1)-LKTEQDQNPCEPDAE(2) | 2905,320197 | Carbamidomethyl[C](9);Carbamidomethyl[C](24)                       | 4,19E-17 | 2,90E-01 | 6,377954 |
| sp P40424 PXB1_HUMAN(153)-sp P55347-2 PKNX1_HUMAN(153)    |                                                    | 1 |             |                                |             |                                                                    |          |          |          |
|                                                           | CB_FB_180416_Prep1_Tryp_GluC_3.7547.7547.3.0.dta   | 3 | 1677,891223 | AKLSQIR(2)-TKMNSE(2)           | 1677,883916 | Oxidation[M](13)                                                   | 3,92E-04 | 3,55E-01 | 4,35489  |

#### Table legend

|                      |                                                                                                                                    |
|----------------------|------------------------------------------------------------------------------------------------------------------------------------|
| Protein              | Accession number of the proteins involved in cross linking; the site position of the xl-Lys on the protein is reported in brackets |
| Title                | File name. dat (and corresponding. tif) of the ms2 annotated spectrum (as reported in the repository)                              |
| Spectrum Number      | Frequency of the ms2 spectra                                                                                                       |
| Charge               | Charge of the fragmented ion                                                                                                       |
| Precursor Mass       | Observed mass from the precursor ion (Da)                                                                                          |
| Peptide              | Sequence of cross-linked peptide pair, the site position of the Lys involved in cross-linking is reported in brackets              |
| Peptide Mass         | Theoretical mass of cross-linked peptide (Da)                                                                                      |
| Modifications        | Cys Carbamidomethyl or Met Oxidation                                                                                               |
| Value                |                                                                                                                                    |
| Score                | pLink score                                                                                                                        |
| Precursor Mass Error | precursor mass error in ppm                                                                                                        |

Criteria applied for manual evaluation of spectra confidently identified = E-value < 0,001 (corresponding to FDR < 0,05); the majority of the ions of the spectrum are assigned and 4 consecutive b or y ions for each xl peptide pair observed

Supplementary Table S7: PREP1-PBX1 looped peptides Experiment #2

| Protein                            | Title                                              | Spectrum Number | Precursor Mass | Peptide                 | Peptide Mass | Modifications         | Evaluate | Score    | Precursor Mass Error |
|------------------------------------|----------------------------------------------------|-----------------|----------------|-------------------------|--------------|-----------------------|----------|----------|----------------------|
|                                    |                                                    | Charge          | (Da)           |                         | (Da)         |                       |          | pLINK    | (ppm)                |
| sp P55347-2 PKNX1_HUMAN (260)(262) |                                                    | 9               |                |                         |              |                       |          |          |                      |
|                                    | CB_FB_180416_Prep1_Tryp_GluC_3.10137.10137.2.0.dta | 2               | 1835,968731    | LSILHQDDGSSKNKR(12)(14) | 1835,960913  | null                  | 4,06E-79 | 9,32E-17 | 4,258261             |
|                                    | CB_FB_180416_Prep1_Tryp_GluC_3.9933.9933.2.0.dta   | 2               | 1835,968955    | LSILHQDDGSSKNKR(12)(14) | 1835,960913  | null                  | 3,28E-43 | 8,73E-16 | 4,380268             |
|                                    | CB_FB_180416_Prep1_Tryp_GluC_3.9926.9926.2.0.dta   | 2               | 1835,968956    | LSILHQDDGSSKNKR(12)(14) | 1835,960913  | null                  | 2,62E-45 | 2,04E-14 | 4,380812             |
|                                    | CB_FB_180416_Prep1_Tryp_GluC_3.10070.10070.3.0.dta | 3               | 1835,969641    | LSILHQDDGSSKNKR(12)(14) | 1835,960913  | null                  | 2,13E-32 | 4,98E-13 | 4,753914             |
|                                    | CB_FB_180416_Prep1_Tryp_GluC_3.10308.10308.2.1.dta | 2               | 1835,966195    | LSILHQDDGSSKNKR(12)(14) | 1835,960913  | null                  | 1,15E-39 | 1,37E-12 | 2,876968             |
|                                    | CB_FB_180416_Prep1_Tryp_GluC_3.9827.9827.2.0.dta   | 2               | 1835,968925    | LSILHQDDGSSKNKR(12)(14) | 1835,960913  | null                  | 3,81E-22 | 1,35E-10 | 4,363927             |
|                                    | CB_FB_180416_Prep1_Tryp_GluC_3.10421.10421.2.1.dta | 2               | 1835,972486    | LSILHQDDGSSKNKR(12)(14) | 1835,960913  | null                  | 2,17E-20 | 2,18E-06 | 6,303511             |
|                                    | CB_FB_180416_Prep1_Tryp_GluC_3.3614.3614.2.0.dta   | 2               | 1029,536995    | DGSSKNKR(5)(7)          | 1029,532299  | null                  | 3,30E-11 | 2,04E-05 | 4,561294             |
|                                    | CB_FB_180416_Prep1_Tryp_GluC_3.2982.2982.2.0.dta   | 2               | 914,508004     | GSSKNKR(4)(6)           | 914,505361   | null                  | 6,42E-08 | 4,85E-04 | 2,890087             |
| sp P55347-2 PKNX1_HUMAN (102)(105) |                                                    | 7               |                |                         |              |                       |          |          |                      |
|                                    | CB_FB_180416_Prep1_Tryp_GluC_3.16715.16715.2.0.dta | 2               | 1620,733702    | KEGKPFCEDEPE(1)(4)      | 1620,724967  | Carbamidomethyl[C](8) | 7,42E-13 | 9,39E-13 | 5,389563             |
|                                    | CB_FB_180416_Prep1_Tryp_GluC_3.17175.17175.2.0.dta | 2               | 1620,735116    | KEGKPFCEDEPE(1)(4)      | 1620,724967  | Carbamidomethyl[C](8) | 2,28E-12 | 3,77E-08 | 6,262012             |
|                                    | CB_FB_180416_Prep1_Tryp_GluC_3.17040.17040.2.0.dta | 2               | 1620,7374      | KEGKPFCEDEPE(1)(4)      | 1620,724967  | Carbamidomethyl[C](8) | 1,78E-16 | 5,57E-08 | 7,671258             |
|                                    | CB_FB_180416_Prep1_Tryp_GluC_3.16874.16874.2.0.dta | 2               | 1620,737029    | KEGKPFCEDEPE(1)(4)      | 1620,724967  | Carbamidomethyl[C](8) | 2,62E-14 | 1,37E-06 | 7,442348             |
|                                    | CB_FB_180416_Prep1_Tryp_GluC_3.16794.16794.2.0.dta | 2               | 1620,733904    | KEGKPFCEDEPE(1)(4)      | 1620,724967  | Carbamidomethyl[C](8) | 4,84E-16 | 3,36E-06 | 5,514199             |
|                                    | CB_FB_180416_Prep1_Tryp_GluC_3.17331.17331.2.1.dta | 2               | 1620,73517     | KEGKPFCEDEPE(1)(4)      | 1620,724967  | Carbamidomethyl[C](8) | 1,64E-13 | 3,83E-04 | 6,295331             |
|                                    | CB_FB_180416_Prep1_Tryp_GluC_3.17230.17230.2.2.dta | 2               | 1620,734928    | KEGKPFCEDEPE(1)(4)      | 1620,724967  | Carbamidomethyl[C](8) | 1,12E-15 | 3,98E-03 | 6,146015             |
| sp P40424 PBX1_HUMAN (292)(293)    |                                                    | 1               |                |                         |              |                       |          |          |                      |
|                                    | CB_FB_180416_Prep1_Tryp_GluC_3.8063.8063.2.0.dta   | 2               | 988,587947     | YKKNIGK(2)(3)           | 988,582546   | null                  | 4,04E-17 | 1,41E-11 | 5,463378             |
| sp P40424 PBX1_HUMAN (85)(87)      |                                                    | 1               |                |                         |              |                       |          |          |                      |
|                                    | CB_FB_180416_Prep1_Tryp_GluC_3.14434.14434.2.0.dta | 2               | 1324,826938    | IKKTVLSIR(2)(4)         | 1324,819797  | null                  | 1,10E-30 | 8,95E-10 | 5,390167             |

Table legend

|                      |                                                                                                                                    |
|----------------------|------------------------------------------------------------------------------------------------------------------------------------|
| Protein              | Accession number of the proteins involved in cross linking; the site position of the xl-Lys on the protein is reported in brackets |
| Title                | File name .dat (and corresponding .tif) of the ms2 annotated spectrum (as reported in the repository)                              |
| Spectrum Number      | Frequency of the ms2 spectra                                                                                                       |
| Charge               | Charge of the fragmented ion                                                                                                       |
| Precursor Mass       | Observed mass from the precursor ion (Da)                                                                                          |
| Peptide              | Sequence of cross-linked peptide pair, the site position of the Lys involved in cross-linking is reported in brackets              |
| Peptide Mass         | Theoretical mass of cross-linked peptide (Da)                                                                                      |
| Modifications        | Cys Carbamidomethyl or Met Oxidation                                                                                               |
| Evaluate             |                                                                                                                                    |
| Score                | pLink score                                                                                                                        |
| Precursor Mass Error | precursor mass error in ppm                                                                                                        |

Criteria applied for manual evaluation of spectra confidently identified = E-value < 0,001 (corresponding to FDR < 0,05); the majority of the ions of the spectrum are assigned and 4 consecutive b or y ions for each xl peptide pair observed

Supplementary Table S8: MEIS1-PBX1 cross-linked peptides Experiment #1

| Protein                                                 | Title                                              | Spectrum Number | Precursor Mass (Da) | Peptide                      | Peptide Mass (Da) | Modifications          | Value    | Score    | Precursor Mass Error (ppm) |
|---------------------------------------------------------|----------------------------------------------------|-----------------|---------------------|------------------------------|-------------------|------------------------|----------|----------|----------------------------|
|                                                         |                                                    | Charge          |                     |                              |                   |                        |          | pLINK    |                            |
| sp O00470 MEIS1_HUMAN (195)-sp P40424 PBX1_HUMAN (153)  |                                                    | 3               |                     |                              |                   |                        |          |          |                            |
|                                                         | CB_FB_180212_Meis1_Tryp_GluC_1.10186.10186.3.0.dta | 3               | 2204,156338         | GGSKSDSEDIR(4)-AKLSQIR(2)    | 2204,151609       | null                   | 5,30E-10 | 2,95E-10 | 2,145497                   |
|                                                         | CB_FB_180212_Meis1_Tryp_GluC_1.10350.10350.3.0.dta | 3               | 2333,20422          | EGGSKSDSEDIR(5)-AKLSQIR(2)   | 2333,194197       | null                   | 7,48E-08 | 1,20E-09 | 4,295828                   |
|                                                         | CB_FB_180212_Meis1_Tryp_GluC_1.10404.10404.4.0.dta | 4               | 2333,202239         | EGGSKSDSEDIR(5)-AKLSQIR(2)   | 2333,194197       | null                   | 6,60E-10 | 1,11E-06 | 3,446777                   |
| sp P40424 PBX1_HUMAN (153)-sp P40424 PBX1_HUMAN (242)   |                                                    | 2               |                     |                              |                   |                        |          |          |                            |
|                                                         | CB_FB_180212_Meis1_Tryp_GluC_1.12142.12142.2.0.dta | 2               | 1904,037031         | AKLSQIR(2)-NFNKQATE(4)       | 1904,023512       | null                   | 4,64E-16 | 1,04E-08 | 7,100227                   |
|                                                         | CB_FB_180212_Meis1_Tryp_GluC_1.10613.10613.4.0.dta | 4               | 2060,126643         | AKLSQIR(2)-RNFNKQATE(5)      | 2060,124614       | null                   | 2,02E-06 | 2,45E-02 | 0,984892                   |
| sp O00470 MEIS1_HUMAN (195)-sp P40424 PBX1_HUMAN (242)  |                                                    | 3               |                     |                              |                   |                        |          |          |                            |
|                                                         | CB_FB_180212_Meis1_Tryp_GluC_1.10412.10412.3.0.dta | 3               | 2469,137814         | EGGSKSDSEDIR(5)-NFNKQATE(4)  | 2469,137469       | null                   | 3,56E-09 | 2,79E-05 | 0,139725                   |
|                                                         | CB_FB_180212_Meis1_Tryp_GluC_1.10433.10433.2.0.dta | 2               | 2469,133872         | EGGSKSDSEDIR(5)-NFNKQATE(4)  | 2469,137469       | null                   | 5,00E-04 | 1,24E-01 | -1,456784                  |
|                                                         | CB_FB_180212_Meis1_Tryp_GluC_1.10274.10274.3.0.dta | 3               | 2340,102758         | GGSKSDSEDIR(4)-NFNKQATE(4)   | 2340,094881       | null                   | 2,42E-10 | 6,81E-05 | 3,366103                   |
| sp O00470 MEIS1_HUMAN (178)-sp P40424 PBX1_HUMAN (153)  |                                                    | 1               |                     |                              |                   |                        |          |          |                            |
|                                                         | CB_FB_180212_Meis1_Tryp_GluC_1.12464.12464.3.0.dta | 3               | 1921,09885          | YISCLKGK(6)-AKLSQIR(2)       | 1921,093837       | Carbamidomethyl[C](4)  | 1,35E-19 | 4,97E-12 | 2,609451                   |
| sp P40424 PBX1_HUMAN (153)-sp P40424 PBX1_HUMAN (308)   |                                                    | 1               |                     |                              |                   |                        |          |          |                            |
|                                                         | CB_FB_180212_Meis1_Tryp_GluC_1.13196.13196.3.0.dta | 3               | 1702,990327         | AKLSQIR(2)-ANIYAAK(7)        | 1702,984949       | null                   | 1,94E-20 | 1,53E-11 | 3,157984                   |
| sp O00470 MEIS1_HUMAN (161)-sp P40424 PBX1_HUMAN (65)   |                                                    | 2               |                     |                              |                   |                        |          |          |                            |
|                                                         | CB_FB_180212_Meis1_Tryp_GluC_1.6521.6521.5.0.dta   | 5               | 1927,002383         | LEKVHE(3)-KHALNCHR(1)        | 1926,996585       | Carbamidomethyl[C](6)  | 1,19E-06 | 7,50E-09 | 3,008827                   |
|                                                         | CB_FB_180212_Meis1_Tryp_GluC_1.6538.6538.3.0.dta   | 3               | 1927,005073         | LEKVHE(3)-KHALNCHR(1)        | 1926,996585       | Carbamidomethyl[C](6)  | 7,21E-09 | 1,88E-08 | 4,404782                   |
| sp O00470 MEIS1_HUMAN (195)-sp P40424 PBX1_HUMAN (308)  |                                                    | 1               |                     |                              |                   |                        |          |          |                            |
|                                                         | CB_FB_180212_Meis1_Tryp_GluC_1.11496.11496.3.0.dta | 3               | 2268,109023         | EGGSKSDSEDIR(5)-ANIYAAK(7)   | 2268,098907       | null                   | 2,57E-16 | 1,27E-08 | 4,460123                   |
| sp P40424 PBX1_HUMAN (297)-sp P40424 PBX1_HUMAN (308)   |                                                    | 1               |                     |                              |                   |                        |          |          |                            |
|                                                         | CB_FB_180212_Meis1_Tryp_GluC_1.15874.15874.2.0.dta | 2               | 1851,960175         | NIGKFOEE(4)-ANIYAAK(7)       | 1851,948622       | null                   | 2,73E-06 | 1,15E-05 | 6,238294                   |
| sp O00470 MEIS1_HUMAN (178)-sp O00470 MEIS1_HUMAN (195) |                                                    | 1               |                     |                              |                   |                        |          |          |                            |
|                                                         | CB_FB_180212_Meis1_Tryp_GluC_1.10734.10734.4.2.dta | 4               | 2357,175313         | YISCLKGK(6)-GGSKSDSEDIR(4)   | 2357,165206       | Carbamidomethyl[C](19) | 5,96E-07 | 8,33E-05 | 4,287778                   |
| sp O00470 MEIS1_HUMAN (195)-sp P40424 PBX1_HUMAN (297)  |                                                    | 1               |                     |                              |                   |                        |          |          |                            |
|                                                         | CB_FB_180212_Meis1_Tryp_GluC_1.12715.12715.3.0.dta | 3               | 2482,166163         | EGGSKSDSEDIR(5)-NIGKFOEE(4)  | 2482,15787        | null                   | 3,02E-07 | 3,53E-03 | 3,341045                   |
| sp O00470 MEIS1_HUMAN (126)-sp O00470 MEIS1_HUMAN (132) |                                                    | 1               |                     |                              |                   |                        |          |          |                            |
|                                                         | CB_FB_180212_Meis1_Tryp_GluC_1.18959.18959.3.1.dta | 3               | 2516,350802         | DIAVFAKQIR(7)-AEKPLFSSNPE(3) | 2516,3394         | null                   | 2,36E-08 | 2,21E-02 | 4,531185                   |

Table legend

|                      |                                                                                                                                    |
|----------------------|------------------------------------------------------------------------------------------------------------------------------------|
| Protein              | Accession number of the proteins involved in cross linking; the site position of the xl-Lys on the protein is reported in brackets |
| Title                | File name .dat (and corresponding .tif) of the ms2 annotated spectrum (as reported in the repository)                              |
| Spectrum Number      | Frequency of the ms2 spectra                                                                                                       |
| Charge               | Charge of the fragmented ion                                                                                                       |
| Precursor Mass       | Observed mass from the precursor ion (Da)                                                                                          |
| Peptide              | Sequence of cross-linked peptide pair, the site position of the Lys involved in cross-linking is reported in brackets              |
| Peptide Mass         | Theoretical mass of cross-linked peptide (Da)                                                                                      |
| Modifications        | Cys Carbamidomethyl or Met Oxidation                                                                                               |
| Value                |                                                                                                                                    |
| Score                | pLink score                                                                                                                        |
| Precursor Mass Error | precursor mass error in ppm                                                                                                        |

Criteria applied for manual evaluation of spectra confidently identified = E-value < 0,001 (corresponding to FDR < 0,05); the majority of the ions of the spectrum are assigned and 4 consecutive b or y ions for each xl peptide pair observed

**Supplementary Table S9:** MEIS1-PBX1 looped peptides Experiment #1

| Protein                         | Title                                              | Spectrum Number | Precursor Mass<br>(Da) | Peptide             | Peptide Mass<br>(Da) | Modifications | Evalue   | Score<br>pLINK | Precursor Mass Error<br>(ppm) |
|---------------------------------|----------------------------------------------------|-----------------|------------------------|---------------------|----------------------|---------------|----------|----------------|-------------------------------|
|                                 |                                                    | Charge          |                        |                     |                      |               |          |                |                               |
| sp P40424 PBX1_HUMAN(292)(293)  |                                                    | 10              |                        |                     |                      |               |          |                |                               |
|                                 | CB_FB_180212_Meis1_Tryp_GluC_1.14086.14086.2.0.dta | 2               | 1521,799292            | YKKNIGKFQEE(2)(3)   | 1521,794702          | null          | 1,55E-41 | 7,83E-16       | 3,016176                      |
|                                 | CB_FB_180212_Meis1_Tryp_GluC_1.9800.9800.2.0.dta   | 2               | 988,584694             | YKKNIGK(2)(3)       | 988,582546           | null          | 3,44E-15 | 2,18E-13       | 2,172808                      |
|                                 | CB_FB_180212_Meis1_Tryp_GluC_1.9708.9708.2.0.dta   | 2               | 988,584559             | YKKNIGK(2)(3)       | 988,582546           | null          | 1,66E-19 | 5,37E-13       | 2,036249                      |
|                                 | CB_FB_180212_Meis1_Tryp_GluC_1.9896.9896.2.0.dta   | 2               | 988,585122             | YKKNIGK(2)(3)       | 988,582546           | null          | 1,39E-15 | 2,00E-12       | 2,605751                      |
|                                 | CB_FB_180212_Meis1_Tryp_GluC_1.9931.9931.2.1.dta   | 2               | 988,586181             | YKKNIGK(2)(3)       | 988,582546           | null          | 4,90E-17 | 7,44E-11       | 3,676982                      |
|                                 | CB_FB_180212_Meis1_Tryp_GluC_1.14223.14223.2.0.dta | 2               | 1392,762496            | YKKNIGKFQE(2)(3)    | 1392,752114          | null          | 3,74E-35 | 1,91E-11       | 7,454306                      |
|                                 | CB_FB_180212_Meis1_Tryp_GluC_1.10317.10317.2.0.dta | 2               | 1257,771428            | IRYKKNIGK(4)(5)     | 1257,767706          | null          | 1,18E-19 | 5,78E-11       | 2,959211                      |
|                                 | CB_FB_180212_Meis1_Tryp_GluC_1.10345.10345.3.0.dta | 3               | 1257,770542            | IRYKKNIGK(4)(5)     | 1257,767706          | null          | 1,50E-16 | 1,52E-09       | 2,254788                      |
|                                 | CB_FB_180212_Meis1_Tryp_GluC_1.13716.13716.2.0.dta | 2               | 1790,984771            | IRYKKNIGKFQEE(4)(5) | 1790,979862          | null          | 8,64E-42 | 1,24E-09       | 2,740958                      |
|                                 | CB_FB_180212_Meis1_Tryp_GluC_1.13704.13704.3.0.dta | 3               | 1790,984642            | IRYKKNIGKFQEE(4)(5) | 1790,979862          | null          | 1,55E-46 | 1,54E-08       | 2,66893                       |
| sp P40424 PBX1_HUMAN(293)(297)  |                                                    | 2               |                        |                     |                      |               |          |                |                               |
|                                 | CB_FB_180212_Meis1_Tryp_GluC_1.14784.14784.2.0.dta | 2               | 1521,799196            | YKKNIGKFQEE(3)(7)   | 1521,794702          | null          | 1,37E-11 | 2,43E-06       | 2,953092                      |
|                                 | CB_FB_180212_Meis1_Tryp_GluC_1.15713.15713.2.0.dta | 2               | 1230,642114            | KNIGKFQEE(1)(5)     | 1230,636423          | null          | 3,46E-09 | 9,67E-05       | 4,624437                      |
| sp O00470 MEIS1_HUMAN(270)(271) |                                                    | 5               |                        |                     |                      |               |          |                |                               |
|                                 | CB_FB_180212_Meis1_Tryp_GluC_1.3713.3713.2.0.dta   | 2               | 1024,580156            | PDKDKKR(5)(6)       | 1024,578521          | null          | 1,29E-22 | 2,73E-14       | 1,595778                      |
|                                 | CB_FB_180212_Meis1_Tryp_GluC_1.3695.3695.3.0.dta   | 3               | 1024,579677            | PDKDKKR(5)(6)       | 1024,578521          | null          | 1,88E-15 | 4,06E-14       | 1,128269                      |
|                                 | CB_FB_180212_Meis1_Tryp_GluC_1.3874.3874.3.0.dta   | 3               | 1024,578817            | PDKDKKR(5)(6)       | 1024,578521          | null          | 2,04E-16 | 2,60E-12       | 0,288899                      |
|                                 | CB_FB_180212_Meis1_Tryp_GluC_1.4435.4435.3.1.dta   | 3               | 1024,579647            | PDKDKKR(5)(6)       | 1024,578521          | null          | 5,08E-13 | 1,74E-09       | 1,098988                      |
|                                 | CB_FB_180212_Meis1_Tryp_GluC_1.4439.4439.2.0.dta   | 2               | 1024,580785            | PDKDKKR(5)(6)       | 1024,578521          | null          | 2,11E-15 | 7,60E-09       | 2,209689                      |

**Table legend**

|                      |                                                                                                                                    |
|----------------------|------------------------------------------------------------------------------------------------------------------------------------|
| Protein              | Accession number of the proteins involved in cross linking; the site position of the xl-Lys on the protein is reported in brackets |
| Title                | File name .dat (and corresponding .tif) of the ms2 annotated spectrum (as reported in the repository)                              |
| Spectrum Number      | Frequency of the ms2 spectra                                                                                                       |
| Charge               | Charge of the fragmented ion                                                                                                       |
| Precursor Mass       | Observed mass from the precursor ion (Da)                                                                                          |
| Peptide              | Sequence of cross-linked peptide pair, the site position of the Lys involved in cross-linking is reported in brackets              |
| Peptide Mass         | Theoretical mass of cross-linked peptide (Da)                                                                                      |
| Modifications        | Cys Carbamidomethyl or Met Oxidation                                                                                               |
| Evalue               |                                                                                                                                    |
| Score                | pLink score                                                                                                                        |
| Precursor Mass Error | precursor mass error in ppm                                                                                                        |

Criteria applied for manual evaluation of spectra confidently identified = E-value < 0,001 (corresponding to FDR < 0,05); the majority of the ions of the spectrum are assigned and 4 consecutive b or y ions for each xl peptide pair observed



**Supplementary Table S11:** MEIS1-PBX1 looped peptides Experiment #2

| Protein                         | Title                                              | Spectrum Number | Precursor Mass<br>(Da) | Peptide          | Peptide Mass<br>(Da) | Modifications | Evalue   | Score<br>pLINK | Precursor Mass Error<br>(ppm) |
|---------------------------------|----------------------------------------------------|-----------------|------------------------|------------------|----------------------|---------------|----------|----------------|-------------------------------|
|                                 |                                                    | <b>Charge</b>   |                        |                  |                      |               |          |                |                               |
| sp P40424 PBX1_HUMAN(85)(87)    | CB_FB_180416_Meis1_Tryp_GluC_7.12585.12585.2.0.dta | 1               |                        |                  |                      |               |          |                |                               |
|                                 |                                                    | 2               | 1324,829242            | IKEKTVLSIR(2)(4) | 1324,819797          | null          | 3,42E-11 | 1,27E-03       | 7,129271                      |
| sp P40424 PBX1_HUMAN(292)(293)  | CB_FB_180416_Meis1_Tryp_GluC_7.7278.7278.2.0.dta   | 1               |                        |                  |                      |               |          |                |                               |
|                                 |                                                    | 2               | 988,587026             | YKKNIGK(2)(3)    | 988,582546           | null          | 1,24E-16 | 5,26E-03       | 4,531741                      |
| sp O00470 MEIS1_HUMAN(305)(306) | CB_FB_180416_Meis1_Tryp_GluC_7.8586.8586.2.1.dta   | 1               |                        |                  |                      |               |          |                |                               |
|                                 |                                                    | 2               | 1096,607915            | QKKQLAQD(2)(3)   | 1096,599648          | null          | 5,46E-07 | 4,05E-02       | 7,538759                      |

**Table legend**

|                      |                                                                                                                                    |
|----------------------|------------------------------------------------------------------------------------------------------------------------------------|
| Protein              | Accession number of the proteins involved in cross linking; the site position of the xl-Lys on the protein is reported in brackets |
| Title                | File name .dat (and corresponding .tif) of the ms2 annotated spectrum (as reported in the repository)                              |
| Spectrum Number      | Frequency of the ms2 spectra                                                                                                       |
| Charge               | Charge of the fragmented ion                                                                                                       |
| Precursor Mass       | Observed mass from the precursor ion (Da)                                                                                          |
| Peptide              | Sequence of cross-linked peptide pair, the site position of the Lys involved in cross-linking is reported in brackets              |
| Peptide Mass         | Theoretical mass of cross-linked peptide (Da)                                                                                      |
| Modifications        | Cys Carbamidomethyl or Met Oxidation                                                                                               |
| Evalue               |                                                                                                                                    |
| Score                | pLink score                                                                                                                        |
| Precursor Mass Error | precursor mass error in ppm                                                                                                        |

Criteria applied for manual evaluation of spectra confidently identified = E-value < 0,001 (corresponding to FDR < 0,05); the majority of the ions of the spectrum are assigned and 4 consecutive b or y ions for each xl peptide pair observed

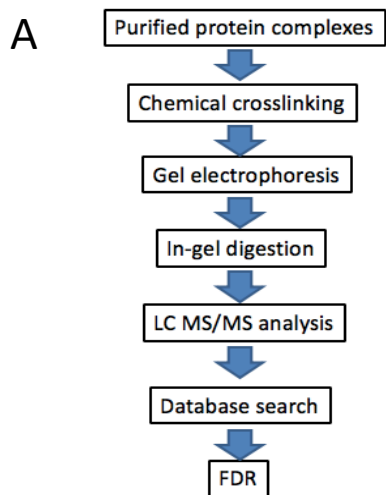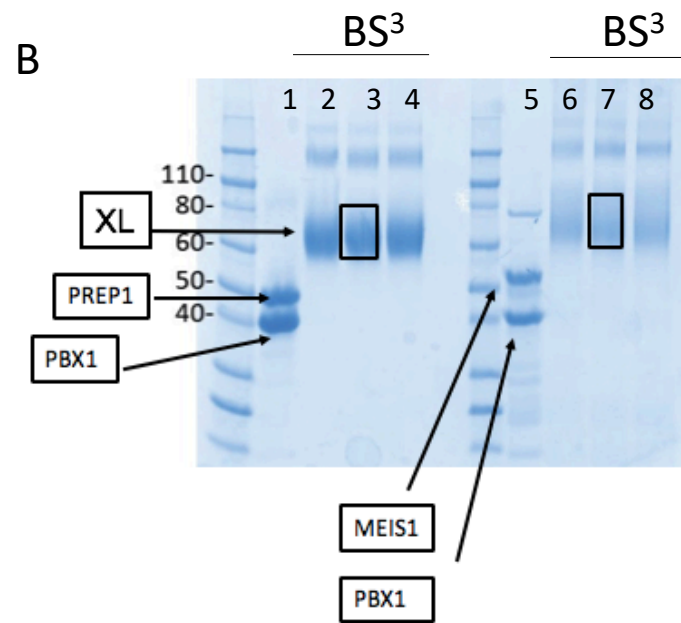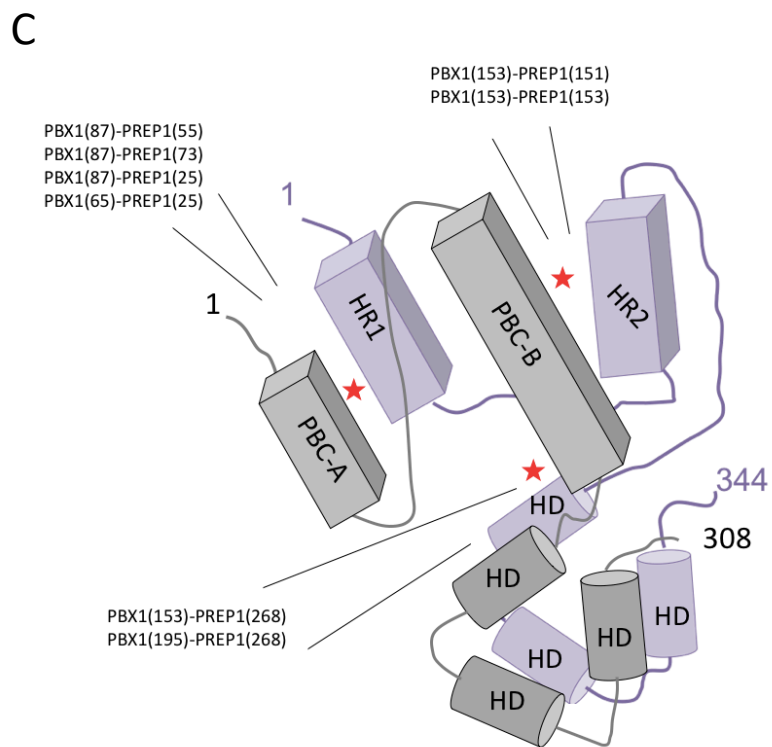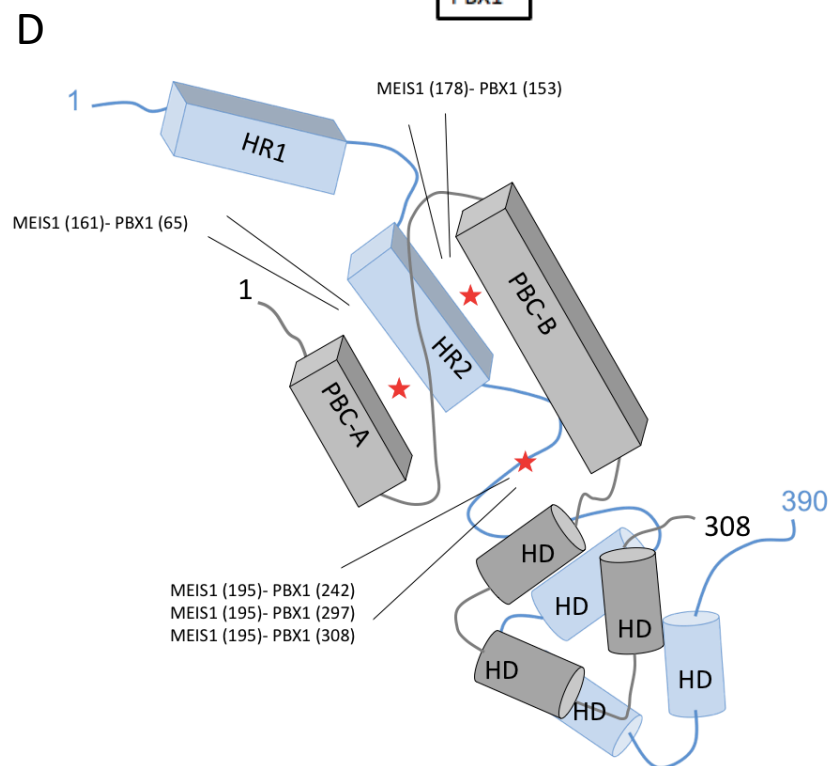



**A**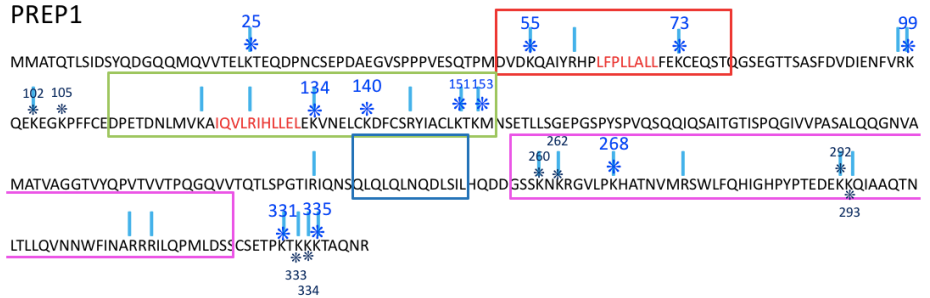**B**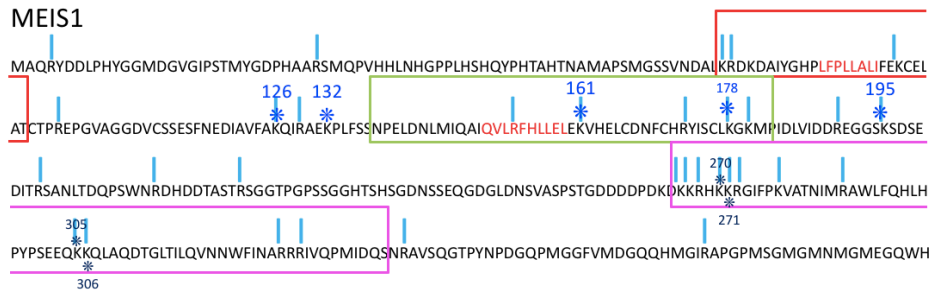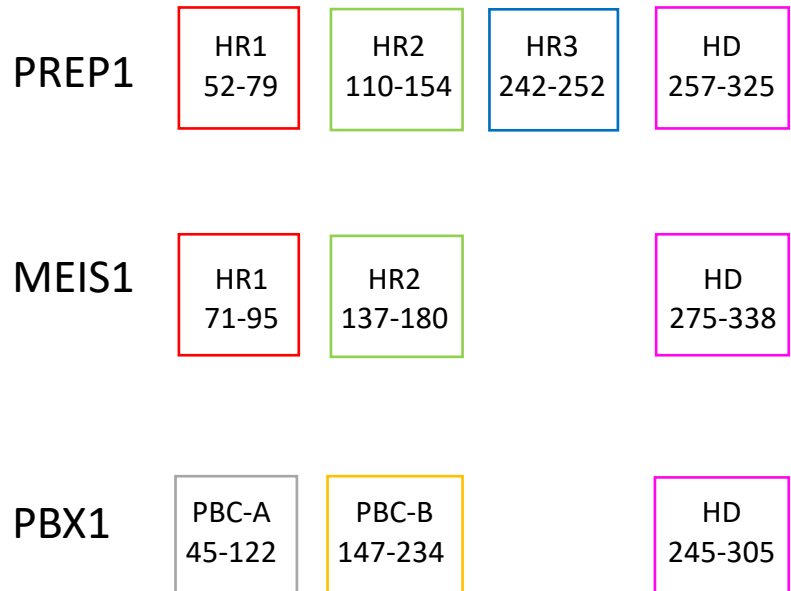**C**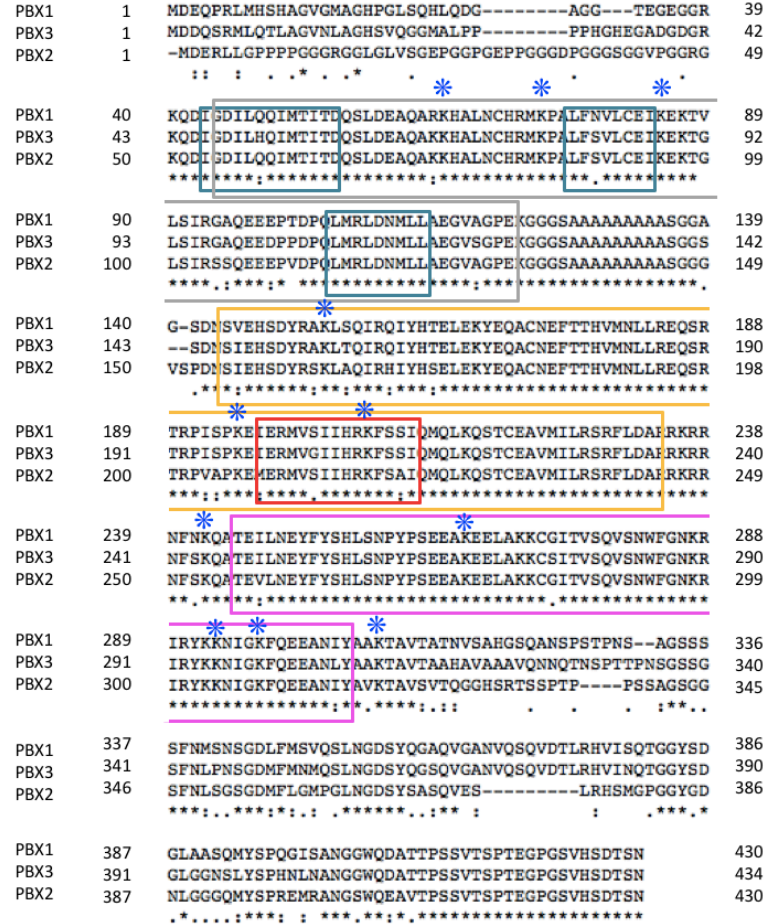

\*K involved in intra and inter cross-links

\*K involved in looped cross-links

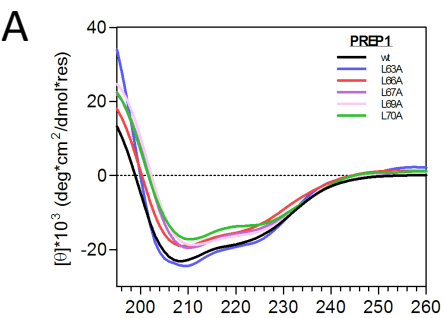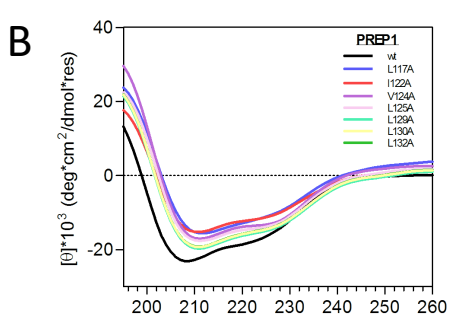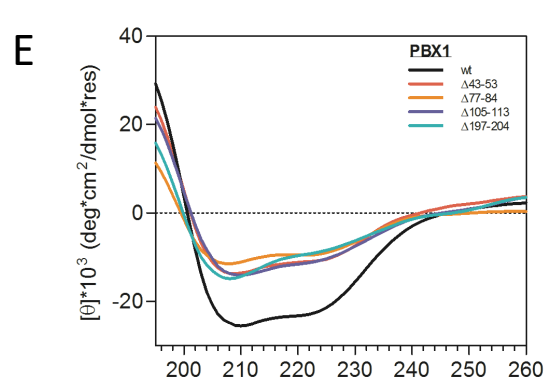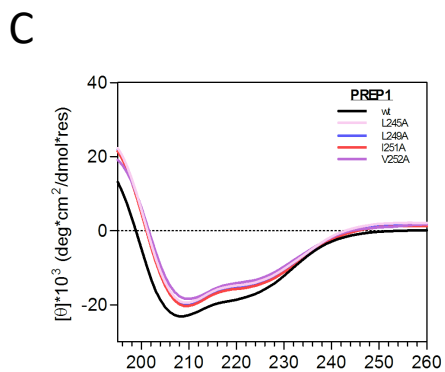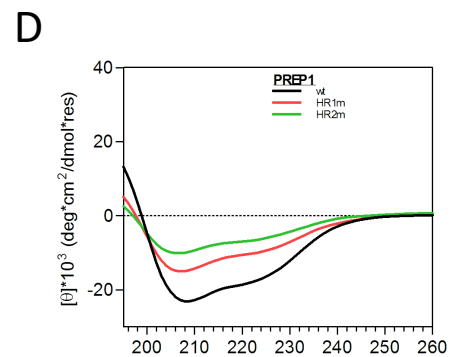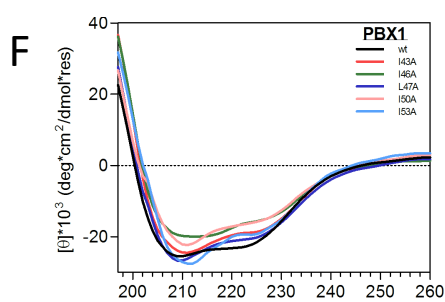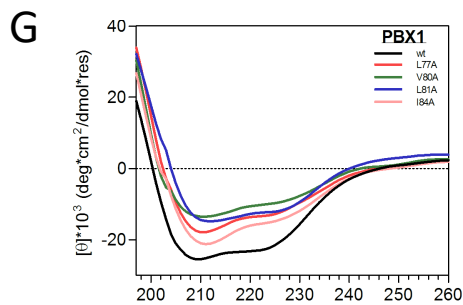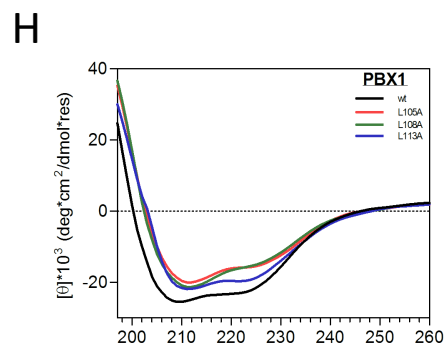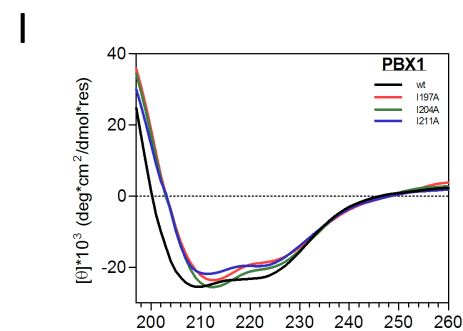

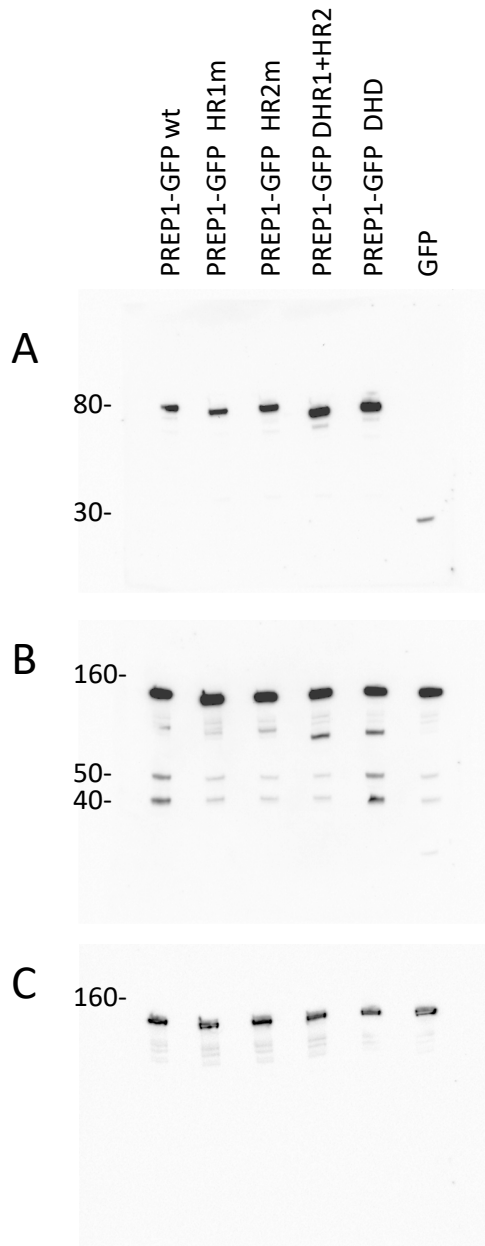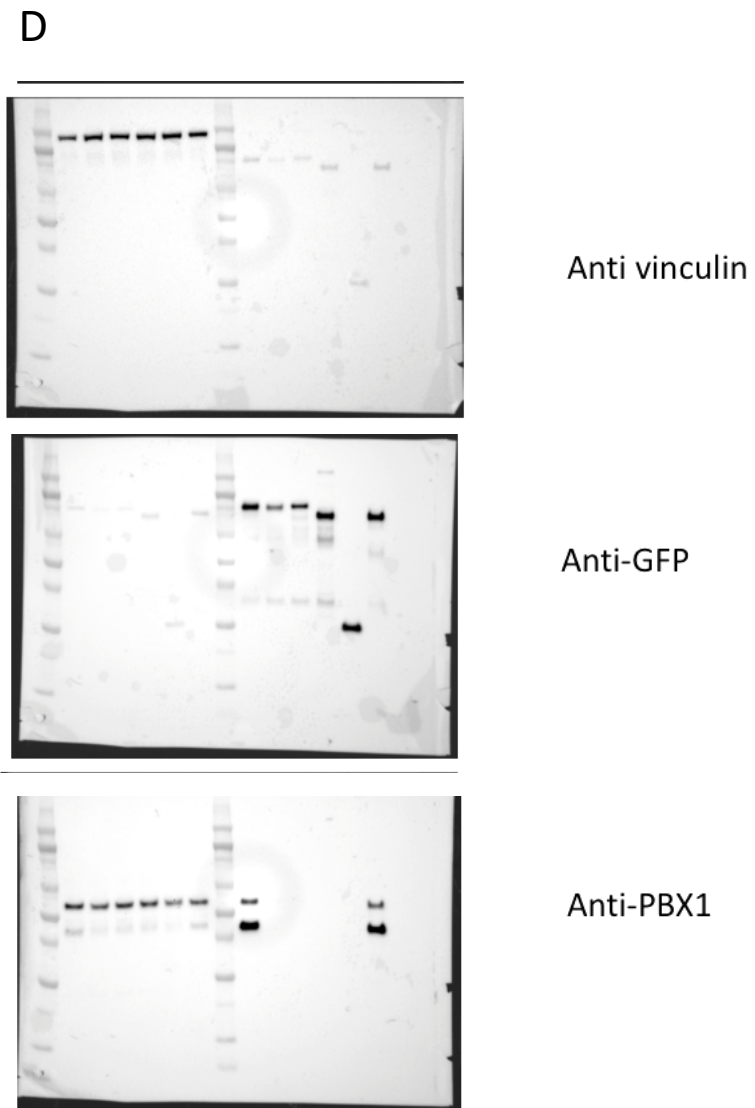

A

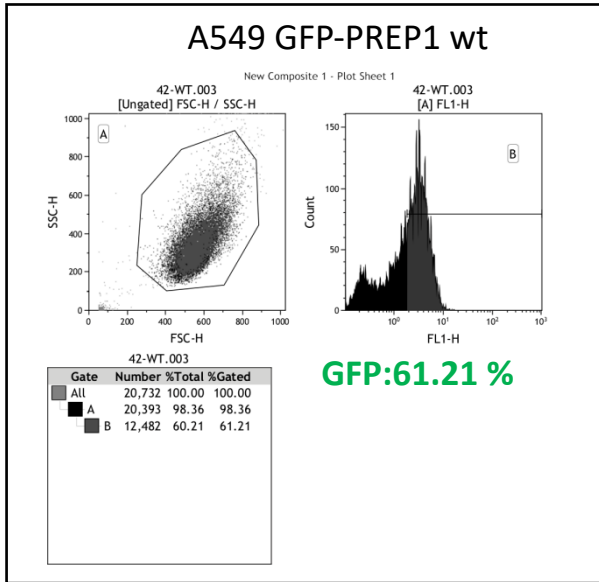

B

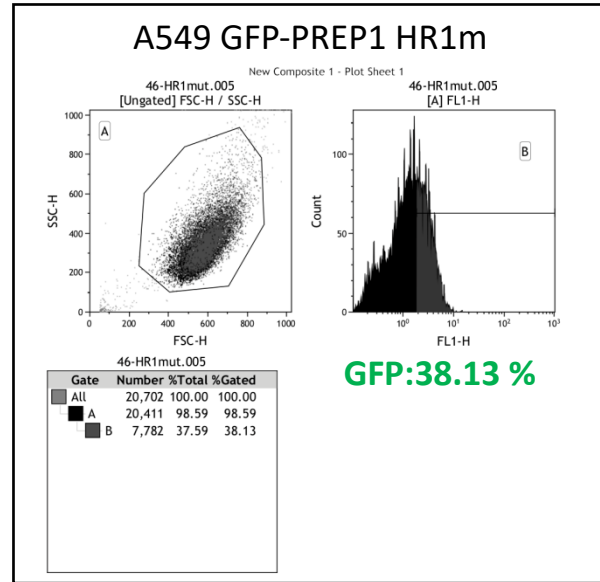

C

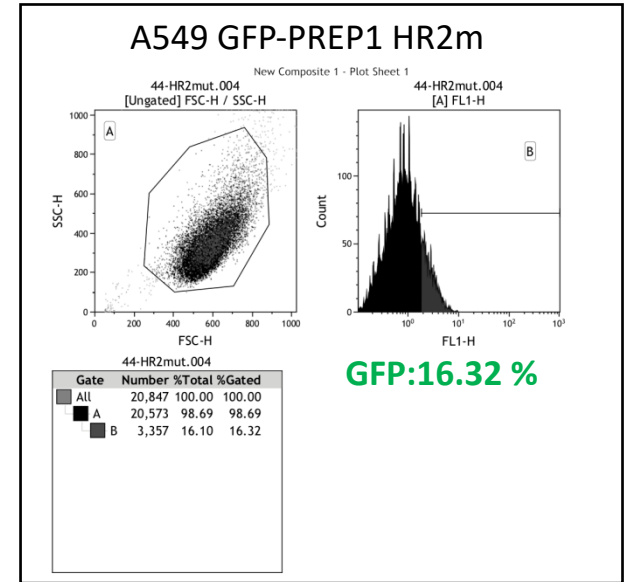

D

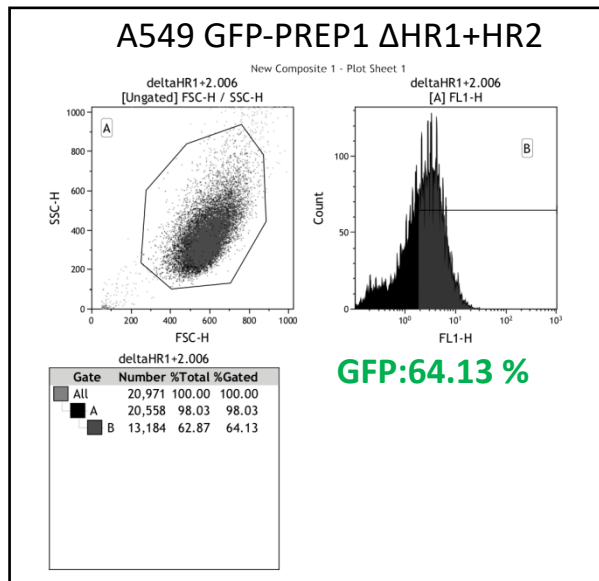

E

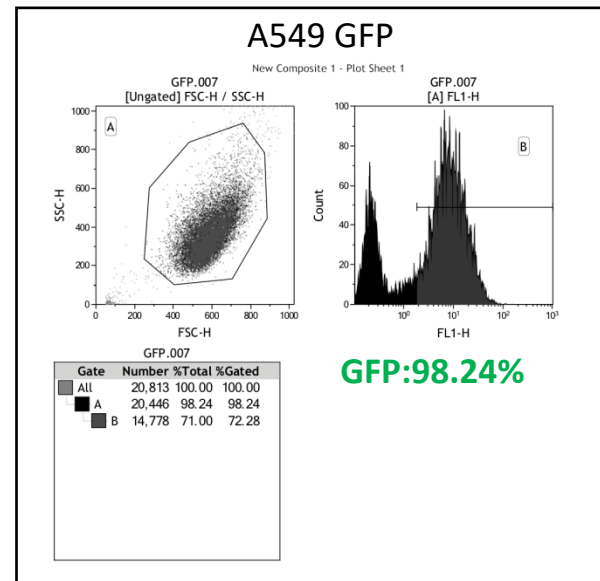

F

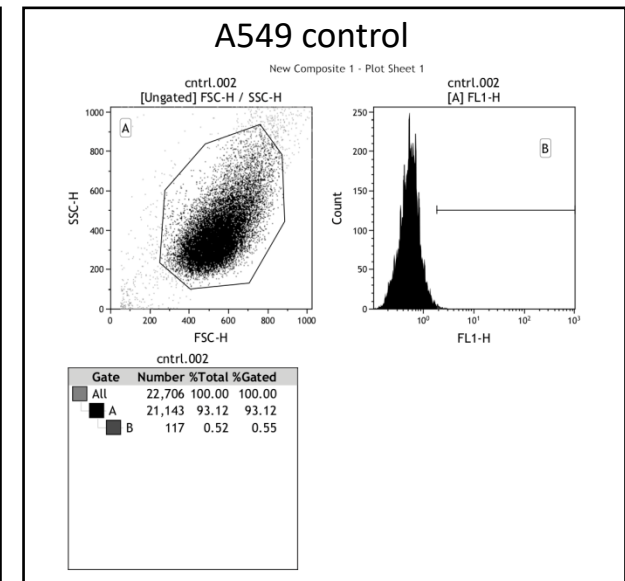

A

- 1 PREP1 1-436 L63A
- 2 PREP1 1-436 L66A
- 3 PREP1 1-436 L67A
- 4 PREP1 1-436 L69A
- 5 PREP1 1-436 L70A
- 6 PREP1 1-436 L117A
- 7 PREP1 1-436 I122A
- 8 PREP1 1-436 V124A
- 9 PREP1 1-436 L125A
- 10 PREP1 1-436 L129A
- 11 PREP1 1-436 L130A

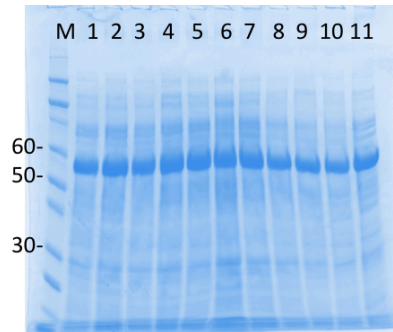

B

- 1 PBX1 1-430 I43A
- 2 PBX1 1-430 I46A
- 3 PBX1 1-430 L47A
- 4 PBX1 1-430 I50A
- 5 PBX1 1-430 I53AA
- 6 PBX1 1-430 L77A
- 7 PBX1 1-430 V80A
- 8 PBX1 1-430 L81A
- 9 PBX1 1-430 L84A
- 10 PBX1 1-430 L105A
- 11 PBX1 1-430 L108A

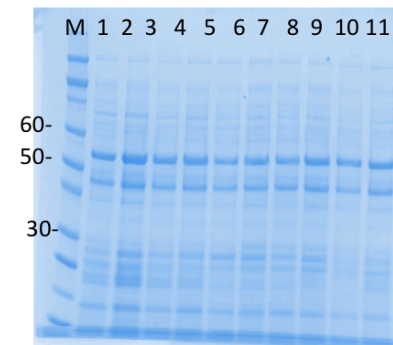

C

- 1 PREP1 1-436 L132A
- 2 PREP1 1-436 L245A
- 3 PREP1 1-436 L249A
- 4 PREP1 1-436 L251A
- 5 PREP1 1-436 L252A

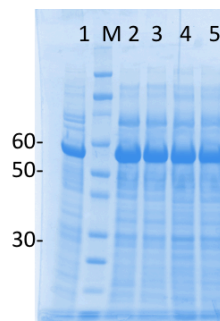

D

- 1 PBX1 1-430 L113A
- 2 PBX1 1-430 L197A
- 3 PBX1 1-430 L204A
- 4 PBX1 1-430 L211A
- 5 PBX1 1-430 I53A

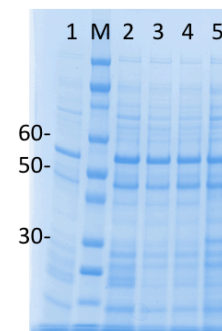

E

- 1 PBX1 1-430 wild-type
- 2 PREP1 1-436 wild-type
- 3 PREP1 1-436<sub>L63A/L66A/L67A/L70A</sub>
- 4 PREP1 1-436<sub>I122A/L125A/L129A/L132A</sub>

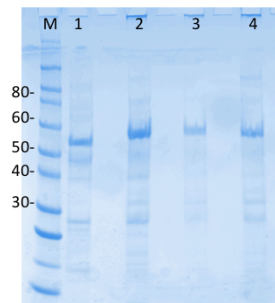

F

- 1 MEIS1 1-390

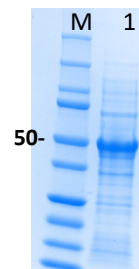

Supplement: 41598_2020_74032_MOESM1_ESM.pdf [file 41598_2020_74032_MOESM1_ESM.pdf]
